# Supplementary material for: High phenotypic plasticity at the dawn of the eosauropterygian radiation
Source: PeerJ. 2023 Sep 1;11:e15776. doi: 10.7717/peerj.15776 (PMC10476616; doi:10.7717/peerj.15776)
Supplement: Supplemental Information 2 [file peerj-11-15776-s002.xlsx]

## Sheet: Eosauropt_measurements_traits
Clade	Species	Specimens	Data collection	Mandible length	Skull length	Snout length	Retroarticular process length	Symphysis length	Dentigerous length	Distance fulcrum - first mandible tooth	Distance fulcrum - last mandible tooth	Distance fulcrum - mid-point of attachment of adductor muscles	Mandible at mid-dentigerous length	Snout height at the naris level	Naris position	Naris length	Skull width ant, to orbit	Orbit length	Orbit height	Occular offset	Parietal foramen length	Supratemporal fenestra length	Supratemporal fenestra width	Postorbital region length	Jaw or rostral constriction	Pointed and recurved tooth crowns	Edentulous suggesting suction feeding	Enlarge procumbent dentary fangs	Bulbous crushing dentition	Anterior crown shape	Posterior crown shape	Crown shape	Absolute tooth crown size	Crown tip offset	Total body length	Neck length	Trunk length	Tail length	Humerus proximodistal length	Humerus anteroposterior width at mid-shaft	Femur proximodistal length	Femur anteroposterior width	Forelimb width	Forelimb length	Hindlimb width	Hindlimb length	Longirostry	Gullet (Snout_width)	Functionnal jaw robusticity
Pachypleurosauroidea	Qianxisaurus chajiangensis	NMNS-KIKO-F044630	Based on Cheng et al., 2012	98.89	90.97	44.18	8.66	NA	55.17	87.32	34.16	14.9	3.5	7.84	24.55	9.56	26.6	26.26	13.71	8.72	2.63	2.53	1.81	21.73	ABSENT	ABSENT	ABSENT	ABSENT	ABSENT	NA	NA	1.02	1.4	NA	NA	115.74	279.67	NA	50.7	9.36	55.49	10.05	NA	NA	NA	NA	0.485655	0.292404	0.0353929
Pachypleurosauroidea	Anarosaurus_heterodontus	Private collection : W Berlelder	Based on pictures	69.21	61.73	26.83	7.82	NA	40.79	60.178	19.83	6.88	NA	NA	11.34	7.2	NA	14.04	10.39	NA	1.96	7.57	3.81	20.26	ABSENT	PRESENT	ABSENT	ABSENT	ABSENT	NA	NA	NA	NA	NA	NA	NA	NA	NA	NA	NA	NA	NA	NA	NA	NA	NA	0.434635	NA	NA
Pachypleurosauroidea	Anarosaurus_heterodontus	NME 480000125	Based on Klein, 2009	NA	NA	NA	7.29	NA	NA	NA	15.28	6.37	1.79	5.28	NA	5.55	NA	10.46	7.076	6.29	NA	5.067	1.75	18.56	NA	PRESENT	ABSENT	ABSENT	ABSENT	NA	NA	2.05	1.35	NA	NA	NA	NA	NA	NA	NA	NA	NA	NA	NA	NA	NA	NA	NA	NA
Pachypleurosauroidea	Anarosaurus_heterodontus	NME 480000130	Based on Klein, 2009	NA	47.27	19.35	NA	NA	NA	NA	NA	NA	NA	NA	NA	NA	NA	12.27	8.67	NA	1.35	5.15	2.16	15.19	ABSENT	PRESENT	ABSENT	ABSENT	ABSENT	NA	NA	1.92	NA	NA	NA	NA	NA	NA	NA	NA	NA	NA	NA	NA	NA	NA	0.409351	NA	NA
Pachypleurosauroidea	Anarosaurus_heterodontus	NMNHL RGM 443855	Based on pictures	25.88	23.68	NA	3.04	1.99	NA	22.29	NA	2.52	1.22	NA	NA	NA	NA	NA	NA	NA	NA	NA	NA	NA	ABSENT	PRESENT	ABSENT	ABSENT	ABSENT	NA	NA	2.18	0.624	NA	NA	NA	NA	NA	NA	NA	NA	NA	NA	NA	NA	NA	NA	NA	0.0471406
Pachypleurosauroidea	Anarosaurus_heterodontus	NMNHL RGM 443856	Based on Klein, 2009	26.5	24.07	NA	3.04	1.5	NA	NA	8.54	3.57	1.4	NA	NA	NA	NA	NA	NA	NA	NA	NA	NA	NA	ABSENT	PRESENT	ABSENT	ABSENT	ABSENT	NA	NA	NA	NA	NA	NA	NA	NA	NA	NA	NA	NA	NA	NA	NA	NA	NA	NA	NA	0.0528302
Pachypleurosauroidea	Anarosaurus_heterodontus	SIPG R 594	Based on Klein, 2012	48.88	43.27	NA	6.45	2.58	26.49	41.55	15.75	6.35	2.46	NA	NA	NA	NA	NA	NA	NA	NA	NA	NA	NA	ABSENT	PRESENT	ABSENT	ABSENT	ABSENT	NA	NA	NA	NA	NA	NA	NA	NA	NA	25.96	3.07	NA	NA	NA	NA	NA	NA	NA	NA	0.0503273
Pachypleurosauroidea	Anarosaurus_heterodontus	SIPG R 595	Based on Klein, 2012	NA	NA	NA	NA	NA	NA	NA	NA	NA	NA	NA	NA	NA	NA	NA	NA	NA	NA	NA	NA	NA	NA	NA	NA	NA	NA	NA	NA	NA	NA	NA	NA	NA	NA	NA	NA	NA	23.06	2.44	NA	NA	9.68	48.53	NA	NA	NA
Pachypleurosauroidea	Anarosaurus_heterodontus	SIPG R 596	Based on Klein, 2012	NA	NA	NA	NA	NA	NA	NA	NA	NA	NA	NA	NA	NA	NA	NA	NA	NA	NA	NA	NA	NA	ABSENT	NA	NA	NA	NA	NA	NA	NA	NA	NA	NA	NA	NA	NA	22.08	3.86	NA	NA	NA	NA	NA	NA	NA	NA	NA
Pachypleurosauroidea	Anarosaurus_heterodontus	NMNHL Wijk06-38	Based on Klein, 2012	NA	NA	NA	NA	NA	NA	NA	NA	NA	NA	NA	NA	NA	NA	NA	NA	NA	NA	NA	NA	NA	NA	NA	NA	NA	NA	NA	NA	NA	NA	NA	NA	NA	NA	NA	NA	NA	39.08	3.46	NA	NA	NA	NA	NA	NA	NA
Pachypleurosauroidea	Anarosaurus_heterodontus	NMNHL Wij06-266	Based on Klein, 2012	NA	NA	NA	NA	NA	NA	NA	NA	NA	NA	NA	NA	NA	NA	NA	NA	NA	NA	NA	NA	NA	NA	NA	NA	NA	NA	NA	NA	NA	NA	NA	NA	NA	NA	NA	NA	NA	37.94	4.03	NA	NA	NA	NA	NA	NA	NA
Pachypleurosauroidea	Anarosaurus_heterodontus	NMNHL Wijk09-582	Based on Klein, 2012	NA	NA	NA	NA	NA	NA	NA	NA	NA	NA	NA	NA	NA	NA	NA	NA	NA	NA	NA	NA	NA	NA	NA	NA	NA	NA	NA	NA	NA	NA	NA	NA	NA	NA	NA	NA	NA	45.94	4.46	NA	NA	NA	NA	NA	NA	NA
Pachypleurosauroidea	Anarosaurus_heterodontus	NMNHL RGM.443858	Based on pictures	31.35	28.72	12.54	2.81	NA	NA	28.92	NA	10.14	NA	3.31	4.7	3.2	10.57	7.46	5.2	4.57	0.752	3.71	1.016	8.33	ABSENT	PRESENT	ABSENT	ABSENT	ABSENT	NA	NA	NA	NA	NA	NA	NA	NA	NA	11.38	1.88	NA	NA	NA	NA	NA	NA	0.43663	0.368036	NA
Pachypleurosauroidea	Dawazisaurus_brevis	NMNS000933-F034397	Based on Chang et al., 2016	50.38	44.95	14.61	5.93	NA	25.66	43.46	21.06	9.28	NA	2.91	7.26	3.54	15.37	10.604	7.56	3.35	1.57	9.61	3.65	19.7	ABSENT	PRESENT	ABSENT	PRESENT	ABSENT	2.66	1.758	1.97	0.82	NA	423.8	105.27	107.38	172.23	26.62	5.603	36.47	4.19	10.76	61.03	13.728	79.23	0.325028	0.341935	NA
Pachypleurosauroidea	Diandongosaurus_acutidentatus	IVPP V17760	Based on Shang et al., 2011	26.443	23.494	9.795	2.843	NA	13.76	23.881	9.856	3.32	NA	NA	4.12	3.579	NA	5.591	4.644	2.78	1.432	3.476	2.71	6.893	ABSENT	PRESENT	ABSENT	PRESENT	ABSENT	4.12	1.64	2.33	1.04	NA	292.82	72.49	81.6	116.71	16.5	2.52	24.21	1.95	7.64	39.28	10.67	60.46	0.370419	NA	NA
Pachypleurosauroidea	Diandongosaurus_acutidentatus	NMNS-000933-F03498	Based on Sato et al., 2013	32	28.82	NA	3.2	4.4	NA	27.76	NA	4.5	NA	NA	NA	NA	NA	NA	NA	NA	NA	NA	NA	NA	ABSENT	PRESENT	NA	PRESENT	ABSENT	4.46	NA	2.23	0.94	NA	NA	85.33	95.43	NA	18.82	3.29	24.39	2.73	6.34	42.49	11.51	64.28	NA	NA	NA
Pachypleurosauroidea	Dianmeisaurus_gracilis	IVPP V 17054	Based on Shang et al., 2017	21.56	18.72	5.13	3.41	NA	NA	18.25	NA	2.11	NA	NA	1.68	0.9	7.87	5.88	4.28	NA	1.18	3.53	1.4	7.86	ABSENT	PRESENT	ABSENT	ABSENT	ABSENT	2.43	2.54	2.38	0.64	NA	268.71	62.29	68.94	119.95	13.44	2.35	16.97	1.45	4.53	31.36	5.71	39.92	0.274038	0.420406	NA
Pachypleurosauroidea	Dianmeisaurus_gracilis	IVPP V 18630	Based on Shang & Li, 2015	26.21	22.67	NA	4.3	1.83	11.54	22.32	12.06	3.8	NA	NA	2.69	2.51	10.45	NA	NA	NA	NA	NA	NA	9.65	ABSENT	NA	ABSENT	ABSENT	ABSENT	3.68	3.16	2.8	0.67	NA	307.82	75.49	85.63	125.77	17.4	2.84	20.38	1.44	5.78	40.92	7.15	46.03	NA	0.460962	NA
Pachypleurosauroidea	Dianopachysaurus_dingi	LPV 31365	Based on Liu et al., 2011	26.05	23.82	7.56	2.39	NA	NA	NA	NA	NA	NA	NA	3.75	1.42	9.08	6.07	4.84	NA	1.2	4.66	1.61	10.11	ABSENT	NA	ABSENT	ABSENT	ABSENT	2.79	2.11	1.91	0.674	NA	NA	36.66	47.58	NA	9.31	2.13	13.52	1.99	NA	NA	NA	NA	0.31738	0.381192	NA
Pachypleurosauroidea	Honghesaurus_longicaudalis	IVPP V30380	Based on Xu et al., 2022	38.129	34.137	15.664	4.375	NA	21.45	33.4	11.99	3.415	1.4	2.26	7.03	3.717	10.87	8.533	6.55	2.76	1.29	4.04	2.64	8.71	ABSENT	ABSENT	ABSENT	ABSENT	ABSENT	1.447	1.276	1.49	0.4	NA	458.36	53.806	116.367	250.22	15.54	2.31	16.42	2.08	5.162	36.41	5.882	44.437	0.458857	0.318423	0.0367175
Pachypleurosauroidea	Keichousaurus_hui	NMNS-cyn-2003-25	Based on Holmes & Cheng, 2008	25.22	21.85	NA	3.64	2.03	13.57	20.94	8.27	3.45	1.04	NA	3.26	NA	NA	NA	NA	NA	NA	NA	NA	NA	ABSENT	PRESENT	ABSENT	ABSENT	ABSENT	2.75	NA	2.75	0.76	0.2	NA	NA	NA	NA	NA	NA	NA	NA	NA	NA	NA	NA	NA	NA	0.0412371
Pachypleurosauroidea	Keichousaurus_hui	NMNS-cyn-2005-05	Based on Holmes & Cheng, 2008	19.44	16.62	5.2	3.15	NA	NA	16.29	NA	2.49	NA	NA	2.3	1.43	6.59	5.16	3.51	NA	0.49	3.28	1.37	6.34	ASBENT	PRESENT	ABSENT	ASBENT	ABSENT	3.71	NA	3.17	0.74	0.19	NA	NA	NA	NA	NA	NA	NA	NA	NA	NA	NA	NA	0.312876	0.39651	NA
Pachypleurosauroidea	Keichousaurus_hui	NMNS-cyn-2005-12	Based on Holmes & Cheng, 2008	27.46	23.38	NA	4.19	1.23	14.05	22.42	8.64	NA	1.044	NA	NA	NA	8.83	NA	NA	NA	NA	NA	NA	NA	ABSENT	PRESENT	ABSENT	ABSENT	ABSENT	NA	NA	NA	NA	NA	NA	NA	NA	NA	NA	NA	NA	NA	NA	NA	NA	NA	NA	0.377673	0.0380189
Pachypleurosauroidea	Keichousaurus_hui	SMNS 81780	First-hand examination	23.47	19.21	NA	3.56	1.46	10.55	18.58	8.69	2.12	NA	NA	1.79	2.02	NA	NA	NA	NA	NA	NA	NA	NA	ABSENT	NA	ABSENT	ABSENT	ABSENT	2.96	2.59	2.47	0.69	NA	235.91	65.68	68.94	97.23	14.25	3	14.67	1.49	5.56	33.01	5.97	32.33	NA	NA	NA
Pachypleurosauroidea	Keichousaurus sp.	SMNS 59705	First-hand examination	21.305	18.27	5.84	3.44	NA	NA	18.33	NA	NA	NA	NA	2.3775	2.14	7.55	5.92	3.75	NA	0.63	2.49	1.439	6.92	ABSENT	NA	ABSENT	ABSENT	ABSENT	3.72	2.41	2.8	0.7	NA	200.02	56.453	47.21	76.8522	11.92	2.47	11.57	1.68	4.86	27.12	5.08	26.46	0.31965	0.413246	NA
Pachypleurosauroidea	Luopingosaurus_imparilis	IVPP V19049	Based on Xu et al., 2023	46.29	42.24	23.69	4.88	3.62	23.92	39.51	16.38	5.27	2.01	NA	14.42	4.06	NA	10.12	7.24	NA	NA	NA	NA	10.17	ABSENT	PRESENT	ABSENT	ABSENT	ABSENT	1.82	1.85	2.22	0.67	NA	NA	82.49	160.4	NA	19.85	3.55	19.93	2.88	5.94	47.16	7.36	53.84	0.560843	NA	0.0434219
Pachypleurosauroidea	Neusticosaurus_edwardsii	PIMUZ T2810	First-hand examination	55.3	50.09	22.55	5.33	1.92	25.45	49.4	NA	6.42	1.7648	NA	9.4	6.29	NA	NA	NA	NA	NA	2.61	1.88	16.4	ABSENT	NA	ABSENT	ABSENT	ABSENT	2.3	1.7	2.14	0.98	0.1122	802	108.7	253.72	497	57.8	5.98	42.29	4.88	15.62	126.79	NA	NA	0.45019	NA	0.0319132
Pachypleurosauroidea	Neusticosaurus_edwardsii	PIMUZ T2811	First-hand examination	62.3	NA	NA	NA	NA	NA	NA	NA	NA	NA	NA	9.3	NA	NA	NA	NA	NA	NA	NA	NA	NA	ABSENT	NA	ABSENT	ABSENT	ABSENT	NA	NA	2.3	1.13	NA	NA	141.44	295.32	NA	55.95	3.05	44.05	6.44	15.58	NA	23.78	130.32	NA	NA	NA
Pachypleurosauroidea	Neusticosaurus_edwardsii	PIMUZ T3430	First-hand examination	40	38.15	17.87	4.53	NA	16.95	38.15	19.91	4.71	1.5195	2.98	6.5	3.97	NA	9.8	6.73	4	NA	2.81	1.44	9.47	ABSENT	NA	ABSENT	ABSENT	ABSENT	NA	NA	2.07	0.82	NA	NA	57.92	148.62	NA	34.92	3.65	NA	NA	NA	NA	NA	NA	0.468414	NA	0.0379875
Pachypleurosauroidea	Neusticosaurus_edwardsii	PIMUZ T3439	First-hand examination	29.9	26.95	NA	3.05	0.96	14.94	26.57	12.58	NA	1.5	NA	6.59	3.3	NA	NA	NA	NA	NA	NA	NA	NA	ABSENT	NA	ABSENT	NA	NA	NA	NA	2.38	0.82	NA	NA	NA	82.12	NA	17.91	2.42	12.32	2.2	NA	NA	NA	NA	NA	NA	0.0501672
Pachypleurosauroidea	Neusticosaurus_edwardsii	PIMUZ T3453	First-hand examination	35.2	33.12	15.35	4.53	NA	NA	32.82	NA	NA	NA	NA	6.27	3.53	NA	8.07	4.57	1.99	2.27	2.57	1.57	9.41	ABSENT	NA	ABSENT	ABSENT	ABSENT	3.06	1.8	1.96	0.91	NA	NA	43.78	125.74	NA	31.15	3.57	19.68	2.9	NA	NA	8.16	61.09	0.463466	NA	NA
Pachypleurosauroidea	Neusticosaurus_edwardsii	PIMUZ T3452	First-hand examination	43.1	39.7	15.13	4.76	NA	NA	42.12	NA	NA	NA	NA	5.42	3.98	NA	8.16	5.87	NA	NA	2.64	1.28	NA	ABSENT	NA	ABSENT	ABSENT	ABSENT	NA	NA	1.95	1.18	NA	NA	90.97	161.46	NA	39.41	4.68	25.44	4.28	NA	NA	NA	NA	0.381108	NA	NA
Pachypleurosauroidea	Neusticosaurus_edwardsii	PIMUZ T3460	First-hand examination	63.1	57.2	27.93	6.34	2.3	31.88	54.69	24.3	NA	NA	NA	9.63	6.38	21.16	NA	NA	NA	NA	NA	NA	18.82	ABSENT	NA	ABSENT	ABSENT	ABSENT	2.61	2	2.22	1.11	NA	1067.49	115.81	347	534.42	80.78	8.96	47.9	7.79	19.67	161.16	24.67	146.41	0.488287	0.36993	NA
Pachypleurosauroidea	Neusticosaurus_edwardsii	PIMUZ T3708	First-hand examination	38.3	34.84	13.77	4.27	NA	NA	35.38	NA	NA	NA	NA	5.56	3.71	NA	8.67	5.65	NA	NA	2.18	1.35	11.72	ABSENT	NA	ABSENT	ABSENT	ABSENT	3.19	NA	2.49	0.83	NA	NA	47.95	128.02	NA	25.26	3.12	17.38	2.61	5.95	54.85	8.48	52.39	0.395235	NA	NA
Pachypleurosauroidea	Neusticosaurus_edwardsii	PIMUZ T3758	First-hand examination	43.9	39.83	17.4	4.39	2.19	NA	41.32	NA	4.61	1.83	NA	7.69	4.29	16.56	NA	NA	NA	NA	NA	NA	11.47	ABSENT	NA	ABSENT	ABSENT	ABSENT	2.72	2.36	2.72	0.86	NA	NA	56.97	158.3	226.96	36.03	3.46	23.31	3.53	8.43	NA	12.29	60.51	0.436857	0.415767	0.0416856
Pachypleurosauroidea	Neusticosaurus_edwardsii	PIMUZ T3759	First-hand examination	NA	NA	NA	NA	NA	NA	NA	NA	NA	NA	NA	NA	NA	NA	NA	NA	NA	NA	NA	NA	NA	NA	NA	NA	NA	NA	NA	NA	NA	NA	NA	NA	NA	NA	NA	NA	NA	17.82	2.64	NA	NA	8.9	51.61	NA	NA	NA
Pachypleurosauroidea	Neusticosaurus_edwardsii	PIMUZ T3776	First-hand examination	NA	NA	NA	4.31	NA	NA	NA	NA	NA	NA	NA	NA	NA	NA	NA	8.26	NA	NA	5.77	2.57	12.31	NA	NA	NA	NA	NA	NA	NA	NA	NA	NA	NA	67.25	162.99	NA	35.07	3.74	23.03	3.08	9.99	NA	11.43	65.28	NA	NA	NA
Pachypleurosauroidea	Neusticosaurus_edwardsii	PIMUZ T4761	First-hand examination	37.5	32.48	14.56	4.81	NA	17.91	33.46	16.08	4.96	0.928	3.4	5.23	4.63	NA	8.93	8.02	2.37	2.52	2.34	NA	10.33	ABSENT	PRESENT	ABSENT	ABSENT	ABSENT	2.54	1.73	2.1	1.1	0.3684	NA	60.96	127.86	NA	23.14	3.57	20.04	3.15	NA	NA	9.56	56.8	0.448276	NA	0.0247467
Pachypleurosauroidea	Neusticosaurus_peyeri	PIMUZ T3393	First-hand examination	33.3	31.7	13.16	3.27	NA	NA	29.95	NA	NA	NA	NA	5.58	NA	11.76	NA	NA	NA	1.39	3.12	1.16	9.88	ABSENT	NA	ABSENT	ABSENT	ABSENT	NA	NA	1.85	NA	NA	378.83	51.97	108.18	188.95	24.17	3.29	20.63	1.85	7.79	50.16	6.64	52.89	0.415142	0.370978	NA
Pachypleurosauroidea	Neusticosaurus_peyeri	PIMUZ T3394	First-hand examination	29.7	24.97	9.61	2.69	1.25	9.37	24.97	15.87	NA	NA	NA	4.2	2.69	8.58	6.18	3.88	NA	NA	NA	NA	7.62	ABSENT	NA	ABSENT	ABSENT	ABSENT	3.77	2.26	2.23	0.67	NA	233.12	34.09	77.35	105.97	NA	NA	12.03	1.34	NA	NA	5.32	33.4	0.384862	0.343612	NA
Pachypleurosauroidea	Neusticosaurus_peyeri	PIMUZ T3395	First-hand examination	29.7	26	9.95	2.84	1.25	12.89	26.44	13.34	NA	0.936	NA	4.8	NA	NA	7.31	5.01	NA	1.07	NA	NA	8.54	ABSENT	PRESENT	ABSENT	ABSENT	ABSENT	3.07	1.7	2.38	0.79	0.3421	313.09	40.39	85.9	152.17	22.84	2.85	18.43	1.88	NA	NA	6.42	46.14	0.382692	NA	0.0315152
Pachypleurosauroidea	Neusticosaurus_peyeri	PIMUZ T3396	First-hand examination	28.2	26.27	NA	2.81	NA	NA	26.04	NA	NA	1.02	NA	NA	NA	NA	4.34	2.94	NA	1.29	NA	NA	8.85	ABSENT	NA	ABSENT	NA	ABSENT	NA	NA	NA	NA	NA	NA	41.06	90.13	NA	13.22	2.24	13.56	1.7	NA	NA	5.86	38.12	NA	NA	0.0361702
Pachypleurosauroidea	Neusticosaurus_peyeri	PIMUZ T3403	First-hand examination	24.6	22.57	9.11	2.46	1.21	NA	23.04	NA	NA	NA	NA	3.82	2.15	8.5	NA	NA	NA	NA	NA	NA	NA	ABSENT	NA	ABSENT	ABSENT	ABSENT	NA	NA	NA	NA	NA	NA	40.91	65.84	NA	17.35	2.78	13.92	1.69	NA	NA	NA	NA	0.403633	0.376606	NA
Pachypleurosauroidea	Neusticosaurus_peyeri	PIMUZ T3410	First-hand examination	27.3	25.99	10.32	2.6	1.3	NA	24.87	NA	NA	NA	NA	4.41	NA	10.15	6.55	4.27	NA	NA	NA	NA	8.29	ABSENT	NA	ABSENT	ABSENT	ABSENT	2.42	NA	2.43	0.51	NA	NA	35.85	77.57	NA	17.55	2.28	14.38	1.65	4.36	34.28	5.11	36.35	0.397076	0.390535	NA
Pachypleurosauroidea	Neusticosaurus_peyeri	PIMUZ T3422	First-hand examination	NA	18.51	10.01	NA	NA	NA	NA	NA	NA	NA	NA	3.25	3.13	NA	5.59	3.44	NA	1.59	2.2	1.02	NA	ABSENT	NA	ABSENT	ABSENT	ABSENT	2.34	2.25	2.52	0.65	NA	NA	36.51	72.95	NA	11.66	1.9	12.62	1.54	2.41	24.88	4.42	35.32	0.540789	NA	NA
Pachypleurosauroidea	Neusticosaurus_peyeri	PIMUZ T3423	First-hand examination	NA	NA	NA	NA	NA	NA	NA	NA	NA	NA	NA	NA	NA	NA	NA	NA	NA	NA	NA	NA	NA	NA	NA	NA	NA	NA	NA	NA	NA	NA	NA	NA	NA	88.53	NA	18.7	2.56	15.74	1.68	NA	NA	6	42.6	NA	NA	NA
Pachypleurosauroidea	Neusticosaurus_peyeri	PIMUZ T3431	First-hand examination	22.6	20.6	7.01	2.81	0.78	10.16	20.15	10.66	2.2	NA	NA	3.6	2.84	7.58	0.842	0.34	NA	NA	NA	NA	6.69	ABSENT	NA	ABSENT	ABSENT	ABSENT	2.55	2.03	2.65	0.52	NA	272.46	39.35	80.33	110.18	16.7	2.14	14.75	1.48	4.53	67.22	4.97	35.64	0.340291	0.367961	NA
Pachypleurosauroidea	Neusticosaurus_peyeri	PIMUZ T3445	First-hand examination	NA	NA	NA	3.17	NA	NA	NA	NA	NA	1.385	NA	NA	4.48	14.13	6.26	4.7	NA	1.82	NA	NA	14.03	ABSENT	NA	ABSENT	ABSENT	ABSENT	NA	2.06	1.98	0.84	NA	NA	88.901	155.308	NA	31.14	4.86	31.37	2.61	7.47	64.04	11.67	67.27	NA	NA	NA
Pachypleurosauroidea	Neusticosaurus_peyeri	PIMUZ T3461	First-hand examination	24.3	22.18	9.21	2.84	NA	NA	22.45	NA	NA	NA	NA	3.9	2.58	9.35	5.7	2.6	NA	0.94	NA	NA	6.93	ABSENT	PRESENT	ABSENT	ABSENT	ABSENT	2.81	2.36	2.48	0.68	0.4901	NA	37.34	67.38	NA	9.75	1.99	11.13	1.93	NA	NA	NA	NA	0.415239	0.421551	NA
Pachypleurosauroidea	Neusticosaurus_peyeri	PIMUZ T3464	First-hand examination	28.3	26.41	12.07	3.19	1.37	13.74	25.13	13.5	NA	NA	NA	4.58	NA	9.22	7.25	3.12	NA	NA	NA	NA	8.69	ABSENT	NA	ABSENT	ABSENT	ABSENT	2.89	2.6	2.52	0.66	NA	305.09	44.88	101.87	157.99	20.45	2.62	15.83	2.09	NA	NA	NA	NA	0.457024	0.34911	NA
Pachypleurosauroidea	Neusticosaurus_peyeri	PIMUZ T3467	First-hand examination	25.7	23.79	9.94	2.79	1.18	11.34	22.79	12.27	NA	NA	NA	4.15	2.84	9.63	6.09	3.57	NA	NA	NA	NA	8.08	ABSENT	NA	ABSENT	ABSENT	ABSENT	2.2	1.84	2.18	0.64	NA	308.37	40.15	90.04	153.98	19.3	2.63	15.21	2.19	NA	NA	5.39	36.51	0.417823	0.404792	NA
Pachypleurosauroidea	Neusticosaurus_peyeri	PIMUZ T3474	First-hand examination	29.3	26.4	12.07	2.83	3.21	NA	NA	NA	NA	NA	NA	4.62	3.35	NA	NA	NA	NA	NA	NA	NA	8.11	ABSENT	NA	NA	NA	NA	NA	NA	NA	NA	NA	NA	46.15	95.72	NA	21.45	2.28	16.6	2.11	5.93	42.65	NA	NA	0.457197	NA	NA
Pachypleurosauroidea	Neusticosaurus_peyeri	PIMUZ T3476	First-hand examination	28.4	25.78	11.65	3.16	NA	13.17	25.24	13.94	3.7	NA	NA	4.06	3.15	11.22	7.57	4.77	NA	1.32	NA	NA	7.69	ABSENT	NA	ABSENT	ABSENT	ABSENT	NA	NA	1.69	0.68	NA	337.01	50.83	80.52	164.53	22.92	2.21	18.27	1.58	NA	NA	7.07	52.59	0.451901	0.435221	NA
Pachypleurosauroidea	Neusticosaurus_peyeri	PIMUZ T3479	First-hand examination	29.5	27.83	12.38	3.25	1.23	13.98	27.43	14.35	NA	NA	NA	5.52	3.61	9.94	NA	NA	NA	NA	NA	NA	8.55	ABSENT	NA	ABSENT	ABSENT	ABSENT	2.47	2.4	1.96	0.65	NA	NA	47.03	87.11	NA	15.33	3.56	15.73	2.09	4.8	NA	5.95	43.54	0.444844	0.357169	NA
Pachypleurosauroidea	Neusticosaurus_peyeri	PIMUZ T3497	First-hand examination	32.7	28.38	12.77	4.21	NA	14.58	28.23	15.66	NA	NA	NA	3.51	4.31	11.2	6.9	4.79	NA	2.13	2.85	NA	9.64	ABSENT	PRESENT	ABSENT	ABSENT	ABSENT	2.78	2.11	1.88	0.74	0.3915	NA	NA	109.59	NA	21.46	3.34	21.53	2.49	6.08	41.02	7.42	53	0.449965	0.394644	NA
Pachypleurosauroidea	Neusticosaurus_peyeri	PIMUZ T3511	First-hand examination	27.8	25.09	10.57	2.96	1.14	12.5	24.17	13.05	3.09	NA	NA	4.29	2.68	9.06	NA	NA	NA	NA	NA	NA	8.11	ABSENT	PRESENT	ABSENT	ABSENT	ABSENT	2.85	2.22	2.07	0.61	0.3678	318.24	42.04	90.32	160	20.45	3.16	17.47	1.63	5.94	40.07	6.13	46.93	0.421283	0.3611	NA
Pachypleurosauroidea	Neusticosaurus_peyeri	PIMUZ T3542	First-hand examination	NA	23.87	9.59	NA	NA	12.92	NA	NA	NA	1.263	NA	3.57	3.35	9.88	5.89	4.48	2.29	1.77	2.14	1.24	7.63	ABSENT	NA	ABSENT	ABSENT	ABSENT	3.07	2.23	2.67	0.7	NA	300.71	39.06	83.06	150.06	17.67	2.83	14.76	1.95	NA	NA	NA	NA	0.40176	0.413909	NA
Pachypleurosauroidea	Neusticosaurus_peyeri	PIMUZ T3546	First-hand examination	31.2	29.03	11.16	3.6	NA	13.48	29.61	17.82	NA	NA	NA	3.31	3.87	9.96	8.6	3.86	NA	1.37	NA	NA	9.19	ABSENT	NA	ABSENT	ABSENT	ABSENT	2.81	1.92	2.99	0.66	NA	NA	53.07	101.1	NA	17.3	2.91	16.42	2.13	4.72	33.95	5.22	41.95	0.38443	0.343093	NA
Pachypleurosauroidea	Neusticosaurus_peyeri	PIMUZ T3607	First-hand examination	24.1	22.07	9.57	2.77	NA	10.92	21.99	11.92	2.74	NA	NA	3.15	2.7	9.78	5.53	4.47	0.9	NA	2.3	1.09	6.3	ABSENT	PRESENT	ABSENT	ABSENT	ABSENT	3.61	2.81	2.61	0.55	0.3619	219.4	32.28	67.32	90.9	9.34	1.63	10.52	1.47	2.97	21.02	3.53	29.33	0.43362	0.443135	NA
Pachypleurosauroidea	Neusticosaurus_peyeri	PIMUZ T3710	First-hand examination	28.9	26.22	12.29	2.96	1.32	13.03	24.99	11.76	NA	NA	NA	4.92	2.5	9.72	6.26	NA	NA	0.86	NA	NA	9.18	ABSENT	NA	ABSENT	ABSENT	ABSENT	NA	NA	1.71	0.59	NA	NA	41.92	84.81	NA	14.4	2.24	15.65	1.52	3.8	31.06	6.26	40.19	0.468726	0.370709	NA
Pachypleurosauroidea	Neusticosaurus_peyeri	PIMUZ T3728	First-hand examination	30.9	27.33	11.36	3.12	1.26	NA	26.89	NA	NA	NA	NA	4.09	3.56	9.93	6.54	4.34	NA	1.52	NA	NA	9.83	ABSENT	NA	ABSENT	ABSENT	ABSENT	NA	NA	2	0.57	NA	NA	45.25	97.23	NA	21.55	2.31	17.65	2.13	NA	NA	6.7	43.63	0.41566	0.363337	NA
Pachypleurosauroidea	Neusticosaurus_peyeri	PIMUZ T3744	First-hand examination	33.9	30.68	12.67	3.82	NA	NA	29.92	NA	4	NA	2.2	3.72	4.27	12.6	6.9	5.15	NA	1.51	3.06	1.24	10.77	ABSENT	NA	ABSENT	ABSENT	ABSENT	NA	NA	1.93	0.78	NA	NA	57.15	116.15	NA	20.87	3.31	20.88	2.15	NA	NA	9.44	56.42	0.412973	0.410691	NA
Pachypleurosauroidea	Neusticosaurus_peyeri	PIMUZ T3902	First-hand examination	25	22.58	9.22	3	NA	NA	23.07	NA	NA	NA	NA	3.33	2.06	NA	5.87	NA	NA	1.17	1.69	1.12	7.73	ABSENT	NA	ABSENT	ABSENT	ABSENT	NA	NA	1.67	0.7	NA	295.29	46.42	85.63	141.96	20.54	2.82	16.52	1.75	NA	NA	5.69	40.43	0.408326	NA	NA
Pachypleurosauroidea	Neusticosaurus_pusillus	PIMUZ T3390	First-hand examination	26.8	24.61	10.68	3.63	NA	10.34	24.47	14.87	NA	NA	NA	3.65	2.86	11.47	6.62	4.7	2.11	1.15	2.1	0.98	7.92	ABSENT	NA	ABSENT	ABSENT	ABSENT	2.81	2.29	2.4	0.6	NA	NA	44.4	78.73	NA	16.49	3.38	16.08	1.43	5.95	NA	NA	NA	0.43397	0.466071	NA
Pachypleurosauroidea	Neusticosaurus_pusillus	PIMUZ T3400	First-hand examination	32.4	29.67	10.65	3.11	NA	13.2	28.61	16.15	NA	NA	NA	3.91	3.6	10.4	8.04	NA	1.73	1.51	NA	NA	NA	ABSENT	NA	ABSENT	ABSENT	ABSENT	NA	NA	1.77	0.66	NA	329.41	44.56	99.9	155.34	23.32	4.2	19.19	1.74	8.19	47.1	NA	NA	0.358948	0.350522	NA
Pachypleurosauroidea	Neusticosaurus_pusillus	PIMUZ T3421	First-hand examination	NA	NA	NA	3.4	NA	NA	NA	NA	NA	NA	NA	NA	NA	NA	7.65	7.55	NA	1.05	2.49	0.74	7.78	ABSENT	NA	ABSENT	NA	ABSENT	2.77	2.34	2.3	0.61	NA	287.98	44.96	86.15	130.57	14.79	3.73	16.34	1.96	NA	NA	5.49	38.86	NA	NA	NA
Pachypleurosauroidea	Neusticosaurus_pusillus	PIMUZ T3426	First-hand examination	28	24.68	9.67	3.23	NA	12.02	25.46	17.08	NA	NA	NA	3.61	2.4	NA	6.9	5.46	NA	1.04	2.7	1.52	7.84	ABSENT	NA	ABSENT	ABSENT	ABSENT	2.85	2.6	3.05	0.5	NA	NA	40.7	81.91	NA	18.51	3.05	16.85	1.91	5.48	NA	NA	NA	0.391815	NA	NA
Pachypleurosauroidea	Neusticosaurus_pusillus	PIMUZ T3429	First-hand examination	26.8	24.18	10.71	3.78	1.16	NA	23.65	NA	NA	NA	NA	3.4	NA	11.79	6.3	5.34	NA	NA	NA	NA	7.57	ABSENT	NA	ABSENT	ABSENT	ABSENT	2.33	NA	NA	NA	NA	NA	36.77	80.88	NA	17.14	3.22	16.25	1.35	NA	NA	NA	NA	0.442928	0.487593	NA
Pachypleurosauroidea	Neusticosaurus_pusillus	PIMUZ T3442	First-hand examination	28.8	25.72	8.9	3.65	NA	11.33	25.72	16.51	NA	NA	NA	3.34	2.39	11.34	6.8	5.64	NA	0.82	1.73	1.32	8.49	ABSENT	NA	ABSENT	ABSENT	ABSENT	2.91	2.77	2.52	0.67	NA	NA	51.94	90.5	NA	19.12	3.27	17.91	1.7	6.06	NA	5.51	43.89	0.346034	0.440902	NA
Pachypleurosauroidea	Neusticosaurus_pusillus	PIMUZ T3468	First-hand examination	31.1	27.87	11.77	3.19	1.25	NA	28.85	NA	NA	NA	NA	5.25	2.72	13.02	6.62	4.94	NA	NA	NA	NA	8.09	ABSENT	NA	ABSENT	ABSENT	ABSENT	2.58	2.29	1.97	0.65	NA	NA	53.92	85.04	NA	17.41	3.53	18.11	1.53	NA	40.49	NA	NA	0.422318	0.467169	NA
Pachypleurosauroidea	Neusticosaurus_pusillus	PIMUZ T3509	First-hand examination	26.7	23.84	8.96	3.48	1.65	NA	NA	NA	NA	NA	NA	3.91	2.64	12.21	7.19	5.32	NA	NA	2.92	2.69	8.98	ABSENT	NA	ABSENT	ABSENT	ABSENT	NA	NA	1.63	0.63	NA	NA	46.7	75.34	NA	18.58	3.6	16.83	3.99	5.87	NA	5.33	NA	0.375839	0.512164	NA
Pachypleurosauroidea	Neusticosaurus_pusillus	PIMUZ T3530	First-hand examination	30.6	26.54	10.6	3.59	NA	16.07	25.68	10.72	3.67	NA	2.36	4.28	4	NA	7.25	5.08	1.58	0.94	1.9	1.05	7.6	ABSENT	NA	ABSENT	ABSENT	ABSENT	2.67	2	1.59	0.69	NA	363.27	51.14	91.89	191.7	17.47	3.34	18.83	1.88	5.83	40.95	5.99	50.7	0.399397	NA	NA
Pachypleurosauroidea	Neusticosaurus_pusillus	PIMUZ T3536	First-hand examination	27	23.9	10.75	3.34	1.35	12.5	24.43	14.77	NA	NA	NA	4.01	2.68	10.7	5.12	3.97	NA	NA	NA	NA	8.27	ABSENT	NA	ABSENT	ABSENT	ABSENT	2.26	2.67	1.65	0.53	NA	302.18	41.99	82.37	145.83	17.52	3.66	17.53	1.76	NA	NA	NA	NA	0.449791	0.447699	NA
Pachypleurosauroidea	Neusticosaurus_pusillus	PIMUZ T3538	First-hand examination	29.3	26.36	9.74	3.56	1	NA	24.94	NA	NA	NA	NA	4.12	2.44	11.09	7.17	3.71	NA	NA	NA	NA	9.21	ABSENT	NA	ABSENT	ABSENT	ABSENT	NA	NA	1.96	0.64	NA	NA	54.28	NA	NA	17.27	3.9	NA	NA	NA	NA	NA	NA	0.369499	0.420713	NA
Pachypleurosauroidea	Neusticosaurus_pusillus	PIMUZ T3547	First-hand examination	27.4	24.78	9.26	NA	NA	11.7	24.7	14.94	NA	NA	NA	3.73	2.75	10.41	7.57	3.97	NA	1.3	2.39	0.83	7.27	ABSENT	PRESENT	ABSENT	ABSENT	ABSENT	2.39	2.39	2.49	0.75	0.1398	NA	42.79	82.28	NA	15.71	3.25	16.07	1.43	6.41	34.17	6.14	38.15	0.373688	0.420097	NA
Pachypleurosauroidea	Neusticosaurus_pusillus	PIMUZ T3556	First-hand examination	28.9	26.58	10.16	3.53	1.35	11.92	26.37	15.53	NA	NA	NA	4.81	NA	10.35	7.68	4.89	NA	NA	2.25	1.38	8.83	ABSENT	PRESENT	ABSENT	ABSENT	ABSENT	NA	NA	NA	NA	0.3381	307.74	44.81	83.25	149.51	17.34	2.64	17.3	1.63	6.44	37.92	NA	NA	0.382242	0.389391	NA
Pachypleurosauroidea	Neusticosaurus_pusillus	PIMUZ T3574	First-hand examination	31.4	29.15	10.75	3.93	1.38	13.89	28.68	15.4	NA	NA	NA	5.33	2.66	10.57	8.18	4.27	NA	NA	2.08	1.47	9.16	ABSENT	PRESENT	ABSENT	ABSENT	ABSENT	2.9	2.78	2.11	0.73	0.3896	337.61	51.99	89.98	167.52	21.88	4.15	20.23	2.23	NA	NA	NA	NA	0.368782	0.362607	NA
Pachypleurosauroidea	Neusticosaurus_pusillus	PIMUZ T3598	First-hand examination	NA	26.5	9.54	3.69	1.3	13.69	26.96	14.88	NA	NA	NA	3.97	2.64	NA	NA	NA	NA	NA	2.39	1.54	NA	ABSENT	NA	ABSENT	ABSENT	ABSENT	3.04	2.06	3.06	0.7	NA	NA	44.95	94.04	NA	16.95	3.64	18.21	1.45	5.41	NA	6.12	44.48	0.36	NA	NA
Pachypleurosauroidea	Neusticosaurus_pusillus	PIMUZ T3601	First-hand examination	24.9	22.58	9.56	3.13	NA	11.27	23.67	14.93	NA	NA	NA	3.23	2.56	10.08	5.49	4.53	NA	1.07	1.85	1.12	8.32	ABSENT	NA	ABSENT	ABSENT	ABSENT	NA	NA	1.85	0.74	NA	NA	41.12	76.91	NA	17.27	3.24	17.39	1.69	6.45	35.75	6.8	40.92	0.423384	0.446413	NA
Pachypleurosauroidea	Neusticosaurus_pusillus	PIMUZ T3604	First-hand examination	26.7	24.9	8.63	2.96	NA	11.97	24.79	13.59	NA	NA	NA	3.35	2.2	9.48	7.25	4.74	NA	1.33	1.62	0.51	9.4	ABSENT	PRESENT	ABSENT	ABSENT	ABSENT	3.39	1.95	1.84	0.69	0.2666	NA	42.78	87.37	NA	16.5	3.33	15.71	1.62	5.77	36.27	5.74	39.72	0.346586	0.380723	NA
Pachypleurosauroidea	Neusticosaurus_pusillus	PIMUZ T3605	First-hand examination	26.6	23.86	9.66	3.45	NA	12.51	23.93	12.7	2.8	NA	NA	3.42	2.96	10.45	5.67	4.75	NA	1.81	NA	NA	8.35	ABSENT	NA	ABSENT	ABSENT	ABSENT	3.84	2.87	2.41	0.69	NA	289.56	43.15	75.78	136.87	18.18	3.68	NA	NA	NA	NA	NA	NA	0.404862	0.437972	NA
Pachypleurosauroidea	Neusticosaurus_pusillus	PIMUZ T3612	First-hand examination	28.3	26.04	10.12	2.66	1.34	NA	25.63	NA	NA	NA	NA	3.95	NA	NA	6.54	4.33	NA	NA	2.37	1.77	8.87	ABSENT	NA	ABSENT	ABSENT	ABSENT	NA	NA	NA	NA	NA	294.09	42.96	76.92	146.57	17.28	3.46	16.58	1.58	NA	NA	5.24	42.61	0.388633	NA	NA
Pachypleurosauroidea	Neusticosaurus_pusillus	PIMUZ T3614	First-hand examination	27.9	25.6	10.37	3.23	NA	NA	26.25	NA	NA	NA	NA	3.56	NA	10.59	6.34	4.56	2.41	NA	1.66	0.91	9.55	ABSENT	NA	ABSENT	ABSENT	ABSENT	2.93	3.03	2.82	0.61	NA	NA	40.16	68.86	NA	16.14	3.21	15.29	1.91	NA	NA	NA	NA	0.405078	0.413672	NA
Pachypleurosauroidea	Neusticosaurus_pusillus	PIMUZ T3625	First-hand examination	29.3	25.92	9.62	3.46	NA	14.28	26.56	NA	NA	NA	2.18	3.62	2.55	NA	5.69	4.42	NA	1.5	1.81	0.92	8.2	ABSENT	NA	ABSENT	ABSENT	ABSENT	3.18	2.3	2.25	0.73	NA	NA	45.52	98.34	NA	21.78	3.34	18.97	1.74	7.48	42.71	5.67	43.78	0.371142	NA	NA
Pachypleurosauroidea	Neusticosaurus_pusillus	PIMUZ T3627	First-hand examination	NA	25.84	10.09	NA	1.33	12.05	25.53	NA	NA	1.143	NA	NA	NA	NA	7.31	4.71	NA	NA	NA	NA	8.55	ABSENT	NA	ABSENT	ABSENT	ABSENT	3.57	3.07	2.63	0.79	NA	NA	43.34	91.55	NA	16.32	3.72	17.09	1.61	NA	NA	6.71	43	0.39048	NA	NA
Pachypleurosauroidea	Neusticosaurus_pusillus	PIMUZ T3639	First-hand examination	33.8	29.63	12.27	3.56	1.43	16.52	30.06	15.12	3.6	NA	NA	5.27	2.46	12.31	6.9	4.48	NA	NA	1.94	1.47	11.06	ABSENT	NA	ABSENT	ABSENT	ABSENT	3.2	2.27	2.39	0.56	NA	387.8	54.61	106.02	199.93	18.66	3.89	18.75	2.14	NA	NA	7.87	47.37	0.414107	0.415457	NA
Pachypleurosauroidea	Neusticosaurus_pusillus	PIMUZ T3649 A	First-hand examination	NA	NA	NA	NA	NA	NA	NA	NA	NA	NA	NA	NA	NA	NA	NA	NA	NA	NA	NA	NA	NA	NA	NA	NA	NA	NA	NA	NA	NA	NA	NA	NA	NA	87.86	NA	13.89	3.09	15.04	1.44	5.67	32.51	NA	NA	NA	NA	NA
Pachypleurosauroidea	Neusticosaurus_pusillus	PIMUZ T3649 B	First-hand examination	27.8	25.37	9.58	3.21	NA	NA	24.27	NA	NA	NA	NA	3.64	2.51	9.75	7.04	4.94	NA	1.14	2.28	1.41	9.46	ABSENT	NA	ABSENT	ABSENT	ABSENT	NA	NA	1.7	NA	NA	NA	43.36	79.98	NA	17.8	3.4	16.87	1.89	NA	NA	5.54	40.31	0.377611	0.384312	NA
Pachypleurosauroidea	Neusticosaurus_pusillus	PIMUZ T3649 C	First-hand examination	21.2	19.29	8.59	2.37	0.82	9.54	20.03	NA	NA	NA	NA	2.79	3.03	8.42	5.01	3.71	NA	NA	1.74	0.6	6.02	ABSENT	NA	ABSENT	ABSENT	ABSENT	NA	NA	NA	NA	NA	NA	32.2	52.27	NA	9.66	2.11	10.97	1.17	3.14	22.09	4.11	26.54	0.445308	0.436496	NA
Pachypleurosauroidea	Neusticosaurus_pusillus	PIMUZ T3653	First-hand examination	22.9	20.6	7.42	2.8	NA	11.06	19.72	8.83	2.67	0.87	NA	NA	NA	8.97	NA	NA	2.14	1.41	NA	NA	NA	ABSENT	NA	ABSENT	ABSENT	ABSENT	3.09	1.98	2.59	0.7	NA	260.18	41.14	69.65	127.43	15.55	2.39	14.69	1.47	NA	NA	NA	NA	0.360194	0.435437	0.0379913
Pachypleurosauroidea	Neusticosaurus_pusillus	PIMUZ T3654	First-hand examination	26.9	24.71	9.89	3.11	NA	11.87	23.29	11.99	2.89	NA	NA	3.65	3.31	10.6	6.73	4.8	2.08	1.33	2.09	1.78	8.87	ABSENT	NA	ABSENT	ABSENT	ABSENT	3.22	2.34	2.44	0.61	NA	NA	48.79	89.86	NA	16.22	3.75	17.1	1.74	5.24	35.86	NA	NA	0.400243	0.428976	NA
Pachypleurosauroidea	Neusticosaurus_pusillus	PIMUZ T3658	First-hand examination	25.5	23.24	9.02	2.74	NA	11.74	21.5	10.48	NA	NA	NA	3.38	3.26	9.09	NA	NA	NA	1.06	1.68	1.05	7.95	ABSENT	NA	ABSENT	ABSENT	ABSENT	3.23	2.08	2.39	0.46	NA	276.75	39.32	74.92	145.5	17.02	3.49	16.38	1.83	NA	NA	NA	NA	0.388124	0.391136	NA
Pachypleurosauroidea	Neusticosaurus_pusillus	PIMUZ T3671	First-hand examination	26	24.24	10.55	2.77	1.23	NA	23.15	NA	2.64	NA	NA	4.27	3.37	11.01	6.41	3.69	NA	NA	NA	NA	7.73	ABSENT	NA	ABSENT	ABSENT	ABSENT	NA	NA	NA	NA	NA	285.27	42.43	80.65	140.15	14.98	3.21	15.73	1.4	5.12	33.42	6.17	38.26	0.435231	0.454208	NA
Pachypleurosauroidea	Neusticosaurus_pusillus	PIMUZ T 3672	First-hand examination	25.3	23.27	NA	2.3	1.3	NA	22.77	NA	NA	1.0653	NA	NA	NA	NA	NA	NA	NA	NA	1.96	1.29	NA	ABSENT	NA	ABSENT	ABSENT	ABSENT	4.32	4.32	3.55	0.78	NA	295.42	39.16	76.87	152.44	17.19	3.33	16.07	1.66	NA	NA	NA	NA	NA	NA	0.0421067
Pachypleurosauroidea	Neusticosaurus_pusillus	PIMUZ T3703	First-hand examination	31.8	28.37	11.53	2.81	1.59	13.61	27.95	15.17	NA	NA	NA	5.6	NA	12.88	7.42	5.36	NA	NA	NA	NA	9.6	ABSENT	NA	ABSENT	ABSENT	ABSENT	2.78	1.83	2.39	0.77	NA	316.5	45.93	80.33	153.5	16.02	3.72	17.3	1.97	5.46	34.5	NA	NA	0.406415	0.454001	NA
Pachypleurosauroidea	Neusticosaurus_pusillus	PIMUZ T3739	First-hand examination	30.3	26.03	10.52	3.67	NA	14.4	26.7	12.84	3.65	NA	NA	4.02	3.36	12.51	6.9	4.71	NA	1.2	1.92	1.09	8.23	ABSENT	NA	ABSENT	ABSENT	ABSENT	3.03	2.12	2.52	0.68	NA	NA	44.89	95.84	NA	16.14	3.91	16.94	1.85	NA	NA	NA	NA	0.404149	0.480599	NA
Pachypleurosauroidea	Neusticosaurus_pusillus	PIMUZ T3741 B	First-hand examination	27.6	25.24	NA	3.02	1.39	NA	NA	NA	NA	NA	NA	4.35	3.07	NA	NA	NA	NA	NA	NA	NA	NA	ABSENT	NA	ABSENT	ABSENT	ABSENT	NA	NA	1.7	NA	NA	289.26	39.24	82.21	140.55	17.36	2.56	16.88	1.59	NA	NA	NA	NA	NA	NA	NA
Pachypleurosauroidea	Neusticosaurus_pusillus	PIMUZ T3803 B	First-hand examination	27.1	25.53	10.38	2.99	NA	NA	24.28	NA	NA	NA	NA	4.16	3.18	10.53	6.67	4.75	NA	NA	NA	NA	7.93	ABSENT	NA	ABSENT	ABSENT	ABSENT	NA	NA	2.17	0.62	NA	NA	42.61	86.04	NA	18.84	3.02	16.72	1.4	6.92	35.47	NA	NA	0.40658	0.412456	NA
Pachypleurosauroidea	Neusticosaurus_pusillus	PIMUZ T3803 D	First-hand examination	NA	NA	NA	3.13	NA	NA	NA	10.66	2.9	NA	NA	NA	3.17	10.55	NA	NA	NA	NA	NA	NA	8.66	NA	NA	NA	NA	NA	NA	NA	NA	NA	NA	NA	51.91	82.97	NA	18.4	3.32	18.79	1.96	5.74	42.52	6.52	44.3	NA	NA	NA
Pachypleurosauroidea	Neusticosaurus_pusillus	PIMUZ T3934	First-hand examination	31.9	28.44	NA	3.68	1.45	14.96	28.42	15.31	3.55	1.0133	NA	5.24	2.64	10.06	NA	NA	NA	NA	NA	NA	NA	ABSENT	NA	ABSENT	ABSENT	ABSENT	NA	NA	2.55	0.71	NA	NA	53.87	100.75	NA	21.64	3.21	20.47	1.76	7.78	48.6	8.07	53.4	NA	0.353727	0.0317649
Pachypleurosauroidea	Neusticosaurus_pusillus	PIMUZ T4289	First-hand examination	26.3	23.52	10.04	3.34	NA	12.44	22.95	12.26	NA	NA	NA	3.66	3.33	10.42	6.54	5.4	NA	0.88	1.82	1.43	7.74	ABSENT	NA	ABSENT	ABSENT	ABSENT	NA	NA	2.15	0.57	NA	278.08	40.42	78.41	136.55	17.73	2.96	16.24	1.53	NA	NA	5.35	39.11	0.426871	0.443027	NA
Pachypleurosauroidea	Neusticosaurus_pusillus	PIMUZ T5942	First-hand examination	28.1	25.52	10.04	3.33	NA	11	25.06	14.71	NA	NA	2.36	3.61	NA	10.42	6.29	4	NA	1.43	NA	NA	7.75	ABSENT	NA	ABSENT	ABSENT	ABSENT	2.66	2.2	2.1	0.63	NA	NA	43.75	NA	NA	15.86	3.2	NA	NA	NA	NA	NA	NA	0.393417	0.408307	NA
Pachypleurosauroidea	Odoiposaurus_teruzzii	MSNM BES SC 1893	Based from Renesto et al., 2014	49.32	46.16	23.96	4.7	NA	NA	45.81	NA	7.73	1.94	3.35	11.53	5.49	21.97	11.74	8.19	3.94	1.6	5.28	1.71	12.98	ABSENT	PRESENT	ABSENT	ABSENT	ABSENT	2.47	2.53	2.22	1.21	NA	NA	NA	NA	NA	46.63	5.98	36.4	3.51	NA	NA	NA	NA	0.519064	0.475953	0.039335
Pachypleurosauroidea	Panzhousaurus_rotundirostris	GMPKU-P- 1059	Based on Jiang et al., 2019	24.41	21.1	5.18	3.1	NA	NA	20.98	NA	NA	NA	NA	1.76	2.899	9.22	6.39	4.31	NA	0.6	3.51	0.99	10.88	ABSENT	PRESENT	ABSENT	ABSENT	ABSENT	3.29	NA	3.09	0.83	0.44	NA	91.35	140.08	NA	29.62	5.32	27.99	2.75	9.028	69.77	10.24	71.3	0.245498	0.436967	NA
Pachypleurosauroidea	Prosantosaurus_scheffoldi	PIMUZ A/III 1197	First-hand examination	50.717	46.29	19.45	4.3	4.058	26.6	46.94	21.7	8.5	2.2	4.54	9.26	3.49	17.18	9.97	7.98	NA	NA	NA	NA	17.96	ABSENT	NA	ABSENT	ABSENT	ABSENT	4.35	1.89	1.88	1.06	NA	NA	NA	NA	321.44	35.507	4.343	32.21	3.27	12.56	70.85	12.38	72.42	0.420177	0.371138	0.043378
Pachypleurosauroidea	Prosantosaurus_scheffoldi	PIMUZ A/III 1240	First-hand examination	NA	NA	NA	NA	NA	NA	NA	NA	NA	NA	NA	NA	NA	NA	NA	NA	NA	NA	NA	NA	NA	NA	NA	NA	NA	NA	NA	NA	NA	NA	NA	NA	88.99	156.08	NA	31.62	4.22	28.05	2.98	12.03	67.44	11.435	73.42	NA	NA	NA
Pachypleurosauroidea	Prosantosaurus_scheffoldi	PIMUZ A/III 1273	First-hand examination	36.06	30.905	NA	4.82	3.08	NA	NA	NA	NA	NA	NA	9.16	NA	15.34	NA	NA	NA	NA	NA	NA	NA	ABSENT	NA	ABSENT	ABSENT	ABSENT	2.16	1.72	2.14	1.03	NA	NA	71.42	101.81	NA	20.15	3.9	21.74	1.63	7.51	43.77	7.82	51.23	NA	0.49636	NA
Pachypleurosauroidea	Prosantosaurus_scheffoldi	PIMUZ A/III 1274	First-hand examination	58.7	53.58	22.07	4.52	NA	29.08	55.36	26.62	8.81	NA	NA	10.27	5.32	20.89	11.94	7.57	NA	2.36	5.3	2.5	19.49	ABSENT	PRESENT	ABSENT	ABSENT	ABSENT	2.22	1.69	1.77	1.1	0.3389	NA	87.91	177.14	NA	38.54	5.93	29.89	3.54	NA	NA	11.8	80.11	0.411907	0.389884	NA
Pachypleurosauroidea	Prosantosaurus_scheffoldi	PIMUZ A/III 1275	First-hand examination	49.1	44.9	NA	4.09	2.8	NA	NA	NA	NA	NA	NA	9.5	NA	17.2	NA	NA	NA	NA	NA	NA	NA	ABSENT	NA	NA	NA	NA	NA	NA	NA	NA	NA	NA	NA	125.1	NA	24.1	3.5	26.1	2.2	8.9	NA	10.44	62	NA	0.383073	NA
Pachypleurosauroidea	Prosantosaurus_scheffoldi	PIMUZ A/III 4566 (CAST)	First-hand examination	49.19	44.855	NA	4.105	3.28	NA	NA	NA	NA	NA	NA	9.64	NA	16.155	NA	NA	NA	NA	NA	NA	NA	ABSENT	NA	NA	NA	NA	NA	NA	NA	NA	NA	NA	85.71	115.99	NA	23.62	3.47	25.79	2.16	NA	NA	9.495	63.365	NA	0.360161	NA
Pachypleurosauroidea	Serpianosaurus_mirigiolensis	PIMUZ T96	First-hand examination	43.06	41.68	18.75	4.29	NA	22.13	40.21	NA	4.08	NA	NA	9.93	2.97	16.76	11.14	7.12	NA	1.41	3.21	2.53	10.83	ABSENT	NA	ABSENT	ABSENT	ABSENT	1.98	2.13	1.58	0.77	NA	399.24	53.31	101.14	204.67	22.5	5.04	21.89	2.35	8.21	44.59	NA	NA	0.449856	0.402111	NA
Pachypleurosauroidea	Serpianosaurus_mirigiolensis	PIMUZ T951	First-hand examination	42.83	39.76	20.38	5.6	NA	21.49	40.43	19.28	4.5	NA	NA	9.01	5.36	15.72	12.38	7.06	4.57	1.08	3.24	2.56	10.65	ABSENT	NA	ABSENT	ABSENT	ABSENT	2.04	1.87	2.17	0.78	NA	NA	55.17	119.63	NA	18.71	4.11	22.46	2.14	6.04	NA	6.41	47.9	0.512575	0.395372	NA
Pachypleurosauroidea	Serpianosaurus_mirigiolensis	PIMUZ T1071	First-hand examination	42.23	38.86	19.09	5.3	NA	21.89	38.12	17.55	NA	NA	2.93	8.92	3.81	14.34	10.36	7.39	4.42	1.42	NA	NA	9.64	ABSENT	NA	ABSENT	ABSENT	ABSENT	NA	NA	NA	NA	NA	348.64	54.87	99.52	156.15	18.34	3.92	20.71	2.25	5.86	36.36	7.89	46.74	0.491251	0.369017	NA
Pachypleurosauroidea	Serpianosaurus_mirigiolensis	PIMUZ T 3675	First-hand examination	49.2	44.56	23.62	5.32	NA	NA	44.05	NA	NA	NA	NA	11.15	3.26	19.43	10.4	7.7	NA	NA	2.52	2.18	11.6	PRESENT	NA	ABSENT	ABSENT	ABSENT	2.62	2.09	1.7	0.921	NA	NA	67.97	134.22	NA	30.86	4.62	29.23	2.5	NA	NA	NA	NA	0.530072	0.436041	NA
Pachypleurosauroidea	Serpianosaurus_mirigiolensis	PIMUZ T3676	First-hand examination	49.56	46.06	20.62	4.71	2.5	29.02	45.76	18.87	NA	NA	NA	11.7	NA	NA	11.87	6.95	NA	NA	NA	NA	12.65	ABSENT	PRESENT	ABSENT	ABSENT	ABSENT	1.98	2.63	1.95	0.78	0.3122	413.34	64.74	125.85	168.3	28.68	6.35	25.84	2.37	10.12	53.49	8.89	59.19	0.447677	NA	NA
Pachypleurosauroidea	Serpianosaurus_mirigiolensis	PIMUZ T3677	First-hand examination	49.13	45.1	22.6	4.35	2.25	24.46	42.6	19.3	NA	NA	NA	11.18	4.36	19.38	11.19	6.91	NA	NA	4.29	2.73	10.05	ABSENT	PRESENT	ABSENT	ABSENT	ABSENT	2.36	1.67	1.64	0.94	0.2638	393.67	64.44	121.11	171.55	30.94	4.82	25.89	2.5	NA	NA	9.17	58.19	0.501109	0.429712	NA
Pachypleurosauroidea	Serpianosaurus_mirigiolensis	PIMUZ T3680	First-hand examination	41.99	39.64	17.68	4.24	NA	22.97	39.14	18.33	NA	NA	4.73	10.19	NA	16.95	10.69	5.37	NA	NA	2.36	2.33	9.29	ABSENT	PRESENT	ABSENT	ABSENT	ABSENT	3.03	1.87	1.7	0.98	0.3669	NA	58.12	110.73	NA	24.93	4.17	23.32	2.4	NA	NA	NA	NA	0.446014	0.427598	NA
Pachypleurosauroidea	Serpianosaurus_mirigiolensis	PIMUZ T3685	First-hand examination	46.35	42.01	17.1	4.81	NA	21.08	42.38	22.23	NA	NA	4.56	9.93	4.54	16.78	11.04	5.95	NA	1.42	2.21	1.97	10.03	ABSENT	NA	ABSENT	ABSENT	ABSENT	2.2	1.69	1.69	1.17	NA	420.59	63.62	107.12	208.24	22.53	4.11	22.46	2.41	7.96	47.99	NA	NA	0.407046	0.399429	NA
Pachypleurosauroidea	Serpianosaurus_mirigiolensis	PIMUZ T3742	First-hand examination	68.17	61.4	32.4	6.2	3.41	NA	NA	NA	NA	NA	NA	17.5	5.73	30.7	13.1	NA	NA	NA	NA	NA	NA	NA	NA	ABSENT	NA	NA	NA	NA	NA	NA	NA	NA	81.12	183.1	NA	49.05	8.11	46.2	3.4	17.4	97.4	NA	NA	0.527687	0.5	NA
Pachypleurosauroidea	Serpianosaurus_mirigiolensis	PIMUZ T3931 (CAST)	First-hand examination	73.9	64.29	32.87	9.2913	NA	44.32	64.28	20.37	8.84	3.1048	NA	15.84	8.93	24.79	15.32	10.72	NA	1.89	4.18	2.31	16.45	ABSENT	PRESENT	ABSENT	ABSENT	ABSENT	2.11	1.79	1.5	1.38	0.2883	647.82	89	179.13	319.3	35.57	4.99	33.56	2.81	11.84	NA	11.2	78.29	0.511277	0.385597	0.0420135
Pachypleurosauroidea	Serpianosaurus_mirigiolensis	PIMUZ T3933	First-hand examination	45.55	42.18	22.82	4.48	NA	26.52	41.46	14.55	4.95	1.742	NA	10.31	6.48	NA	10.6	6.66	2.43	NA	3.15	2.36	12.91	ABSENT	PRESENT	ABSENT	ABSENT	ABSENT	3.01	1.63	3.15	0.91	0.4747	NA	55.08	103.98	NA	NA	NA	23.8	2.62	NA	NA	7.76	57.83	0.541015	NA	0.0382437
Pachypleurosauroidea	Wumengosaurus_delicatomandibularis	GMPKU-P-1210	Based on Jiang et al., 2008	82.47	76.6	48.56	6.16	NA	NA	NA	22.97	7.54	3.2	5.35	NA	NA	NA	16.59	11.03	7.53	2.35	8.67	5.39	11.51	ABSENT	NA	ABSENT	ABSENT	ABSENT	NA	NA	NA	NA	NA	952.62	137.31	301.54	425.37	44.13	6.51	52.43	5.65	NA	NA	NA	NA	0.633943	NA	0.038802
Pachypleurosauroidea	Wumengosaurus_delicatomandibularis	IVPP V15314	Based on Wu et al., 2011	NA	NA	NA	7.04	NA	NA	NA	25.96	5.42	3.39	5.01	NA	16.02	NA	22.49	15.97	8.99	3.58	13.57	7.28	16.76	NA	ABSENT	ABSENT	ABSENT	ABSENT	NA	1.06	1.22	0.65	NA	NA	160.56	315.12	NA	63.94	12.07	59.72	7.79	21.45	140.31	19.78	146.84	NA	NA	NA
Pachypleurosauroidea	Wumengosaurus_delicatomandibularis	NMNS-KIKO-F071129-Z	Based on Wu et al., 2011	70.23	66.02	40.4	5.08	NA	45.38	62.25	18.35	5.39	2.78	4.04	24	8.73	NA	15.16	11.57	6.58	NA	7.04	5.69	11.27	ABSENT	ABSENT	ABSENT	ABSENT	ABSENT	NA	NA	NA	NA	NA	NA	NA	NA	NA	NA	NA	NA	NA	NA	NA	NA	NA	0.611936	NA	0.0395842
Pachypleurosauroidea	Wumengosaurus_delicatomandibularis	ZMNH M8758	Based on Wu et al., 2011	97.4	90.54	55.69	8.12	NA	62.95	87.68	25.1	7.47	3.36	NA	35.35	NA	NA	NA	NA	NA	NA	NA	NA	NA	NA	ABSENT	ABSENT	ASBENT	ABSENT	1.53	1.34	1.53	0.82	NA	NA	191.42	404.278	NA	61.55	9.27	65.96	7.4	20.24	142.3	20.17	158.56	0.615087	NA	0.0344969
Nothosauroidea	Brevicaudosaurus_jiyangshanensis	IVPP V 18625	Based on Shang et al., 2020	77.42	72.34	22.55	7.97	NA	43.26	68.73	29.75	NA	NA	NA	9.6	7.04	24.75	13.83	10.18	NA	1.54	14.93	9.28	36.23	PRESENT	NA	ABSENT	PRESENT	ABSENT	4.05	2.33	2.27	2.43	NA	534.28	161.16	152.04	173.63	51.68	17.4	50	5.6	24.96	107.02	21.75	115.71	0.311722	0.342134	NA
Nothosauroidea	Ceresiosaurus	PIMUZ T2463 (CAST)	First-hand examination	206	180.98	58.2	30.271	21.26	NA	171.54	NA	NA	7.3	NA	32.94	15.75	NA	23.7	22.89	15.59	5.29	NA	NA	100.12	ABSENT	NA	ABSENT	PRESENT	ABSENT	3.05	2.47	2.1		NA	NA	NA	523.6	615.81	91.06	21.23	84.36	8.9	NA	NA	33.04	230.67	0.321582	NA	0.0354369
Nothosauroidea	Ceresiosaurus_calcagnii	PIMUZ T2460	First-hand examination	119.55	105.48	NA	13.35	10.193	67.94	106.386	38.23	13.31	NA	NA	NA	NA	28.361	NA	NA	NA	NA	NA	NA	49.81	ABSENT	NA	ABSENT	PRESENT	ABSENT	3.06	1.76	2.09	2.45	NA	998	232.8	335.74	333.21	63.6	13.57	60.92	8.06	24.18	NA	NA	NA	NA	0.268876	NA
Nothosauroidea	Ceresiosaurus_calcagnii	PIMUZ T2461	First-hand examination	172.6	155.59	52.06	24.48	22.86	NA	152.38	NA	NA	NA	NA	33.72	23.05	NA	23.97	NA	NA	NA	NA	NA	83.86	ABSENT	NA	NA	NA	NA	NA	NA	NA	NA	NA	NA	NA	441.45	NA	101.95	19.18	76.25	7.99	NA	NA	29.68	202.97	0.334597	NA	NA
Nothosauroidea	Ceresiosaurus_calcagnii	PIMUZ T2462	First-hand examination	79.42	69.267	NA	10.41	9.794	NA	68.52	NA	9.94	NA	NA	14.26	NA	22.937	NA	NA	NA	NA	NA	NA	NA	ABSENT	NA	ABSENT	PRESENT	ABSENT	4.64	1.51	2.58	1.97	NA	526.96	99.06	167.33	200	30.38	6.54	30.42	4	14.95	71.91	12.18	80.91	NA	0.331139	NA
Nothosauroidea	Ceresiosaurus_calcagnii	PIMUZ T2464	First-hand examination	207.5	194.1	NA	23.55	30.65	117.51	175.37	53.89	NA	12.838	NA	33.9	19.51	63.1	25.7	23.47	NA	NA	48.31	22.92	96.9	ABSENT	NA	ABSENT	PRESENT	ABSENT	NA	NA	1.94	2.5	NA	2259	395.29	521.45	NA	158.6	33.5	102	11.4	52.13	297.5	37.6	263.1	NA	0.32509	0.0618699
Nothosauroidea	Ceresiosaurus_calcagnii	PIMUZ T4836	First-hand examination	252.28	224.77	NA	31.02	39.34	NA	227.84	89.95	NA	NA	NA	NA	NA	NA	NA	NA	NA	NA	88.04	30.05	114.28	ABSENT	NA	ABSENT	PRESENT	ABSENT	4.34	2.75	2.18	5.45	NA	2332	480	720	1039.55	189	49.5	132.5	17.5	82.8	404	58	359.9	NA	NA	NA
Nothosauroidea	Ceresiosaurus_calcagnii	PIMUZ T5151	First-hand examination	NA	NA	NA	NA	NA	NA	NA	NA	NA	NA	NA	NA	NA	NA	15.8	16.26	NA	3.36	33	12.6	52.03	NA	NA	ABSENT	NA	NA	NA	NA	NA	NA	NA	NA	195.81	280	NA	NA	13.5	53.55	6.51	NA	NA	NA	NA	NA	NA	NA
Nothosauroidea	Ceresiosaurus_calcagnii	PIMUZ T5559 (CAST)	First-hand examination	120.7	105.94	35.59	15.22	NA	69.94	104.02	36.66	15.94	NA	NA	20.03	8.26	31.16	19.66	15.07	NA	3.14	34.33	10.2	52.04	ABSENT	NA	ABSENT	PRESENT	ABSENT	5.1	2.14	2.78	1.87	NA	NA	209.32	289.21	NA	50.82	11.13	47	6.72	18.47	111.74	16.77	119.32	0.335945	0.294129	NA
Nothosauroidea	Lariosaurus_balsami	PIMUZ T4856	First-hand examination	115.7	100.4	30.86	14.8	NA	62.6	97.4	35.6	15	4.2	NA	15.79	4.72	34	16.3	11.6	NA	2.5	27	7.7	52.6	NA	NA	ABSENT	PRESENT	ABSENT	4.18	2.18	2.25	2.63	NA	NA	184.25	278.17	NA	60.86	15.24	73.6	9.5	27.2	130.4	23.1	167.8	0.307371	0.338645	0.0363008
Nothosauroidea	Lariosaurus_buzzii	PIMUZ T2804	First-hand examination	103.852	87.138	28.49	11.1	14.917	NA	89.19	NA	NA	NA	NA	15.551	5.56	31.29	18.8	11.23	NA	2.54	21.336	12.261	37.652	PRESENT	PRESENT	ABSENT	PRESENT	ABSENT	3.15	2.11	1.53	2.28	0.3031	NA	NA	NA	NA	24.747	6.887	34.011	4.046	NA	NA	NA	NA	0.326953	0.359086	NA
Nothosauroidea	Lariosaurus_hongguoensis	GMPKU-P-1011	Based on Jiang et al., 2006	108.24	92.95	32.75	13.25	11.6	NA	92.8	NA	11.79	5.12	7.43	16.99	6.98	28.69	18.72	13.61	8.98	4.5	26.92	10.86	36.8	PRESENT	PRESENT	ABSENT	PRESENT	ABSENT	NA	NA	2.1	1.84	NA	NA	127.5	NA	NA	30.68	7.16	43.36	7.1	18.46	NA	19.8	111.6	0.35234	0.308661	0.0473023
Nothosauroidea	Lariosaurus xingyiensis	IVPP V 11866	Based on Rieppel et al., 2003	104.44	92.59	31.78	14.92	13.22	NA	89.12	NA	15.58	4.618	6.34	16.76	6.38	NA	14.86	8.54	5.82	2.12	31.12	8.37	46.8	PRESENT	NA	ABSENT	PRESENT	ABSENT	4.21	2.14	2.17	2.07	NA	NA	NA	NA	NA	79.9	19.85	99.52	10.52	NA	NA	NA	NA	0.343234	NA	0.0442168
Nothosauroidea	Lariosaurus xingyiensis	XNGM WS-30-R19	Based on Lin et al., 2017	103.38	90.29	31.53	13.89	12.52	55.71	91.26	35.54	14.54	4.99	NA	15.85	6.89	23.54	17.11	11.46	NA	2.53	32.15	9.95	43.3	ABSENT	NA	ABSENT	PRESENT	ABSENT	4.14	2.01	2.05	2.01	NA	NA	180.42	297.81	NA	42.7	12.96	57.64	7.99	21.56	96.8	NA	NA	0.349208	0.260715	0.0482685
Nothosauroidea	Lariosaurus_vosseveldensis	TWE 480000504	Based on Klein et al., 2016	53.31	45.37	13.67	8.32	NA	NA	44.17	NA	NA	NA	NA	6.9	3.09	14.12	9.14	6.82	NA	1.14	13.41	5.15	22.99	ABSENT	NA	ABSENT	PRESENT	NA	NA	NA	2.43	0.69	NA	NA	NA	NA	NA	NA	NA	NA	NA	NA	NA	NA	NA	0.3013	0.311219	NA
Nothosauroidea	Lariosaurus_youngi	WS-30-R24	Based on Ji et al., 2014	214.45	184.82	64.7	28.52	33.48	NA	179.36	NA	26	NA	NA	33.77	11.93	48.25	29.05	24.02	NA	6.52	60.01	18.4	76.18	PRESENT	PRESENT	ABSENT	PRESENT	ABSENT	2.89	1.76	2.41	5.14	0.456	NA	307.03	535.15	NA	93.84	18.93	120.45	12.98	61.28	246.11	54.49	288.72	0.35007	0.261065	NA
Nothosauroidea	Lariosaurus sp.	PIMUZ T4970 (CAST)	First-hand examination	34.2	30.84	12.25	3.48	NA	NA	NA	NA	NA	NA	NA	6.47	4.61	11.95	6.08	5.53	NA	NA	9.34	3.94	11.76	NA	NA	NA	NA	ABSENT	NA	NA	NA	NA	NA	NA	58.95	68.02	72.37	12.4	2.24	16.47	3.1	6.57	29.68	6.1	33.01	0.397211	0.387484	NA
Nothosauroidea	Nothosaurus sp.	SMNS 80264	3D scan	NA	238.6	91.74	NA	NA	NA	NA	NA	NA	NA	NA	59.96	13.81	46.78	29.05	20.71	NA	4.52	80.66	20.01	121.3	PRESENT	NA	ABSENT	PRESENT	ABSENT	3.94	2.55	2.58		NA	NA	NA	NA	NA	NA	NA	NA	NA	NA	NA	NA	NA	0.384493	0.19606	NA
Nothosauroidea	Nothosaurus_cristatus	GPIT-PV-75067	First-hand examination	NA	386.75	134.68	NA	NA	NA	NA	NA	NA	NA	24.16	89.9	24.51	74.23	35.065	26.83	NA	9.24	140.48	31.7975	222.53	PRESENT	PRESENT	ABSENT	PRESENT	ABSENT	2.74	2.3	2.42	5.13	0.2575	NA	NA	NA	NA	NA	NA	NA	NA	NA	NA	NA	NA	0.348235	0.191933	NA
Nothosauroidea	Nothosaurus_luopingensis	IVPP V 24895	Based on Shang et al., 2022	167.83	148.72	43.04	22.3	NA	NA	143.93	NA	31.02	NA	NA	23.18	10.42	47.53	25.59	20.89	NA	3	52.84	13.7	81.36	NA	NA	ABSENT	PRESENT	ABSENT	NA	1.79	2.5	2.54	NA	NA	339.03	NA	NA	91.45	14.04	102.68	9.63	35.14	191.37	38.99	226.19	0.289403	0.319594	NA
Nothosauroidea	Nothosaurus_giganteus	PIMUZ T4829	First-hand examination	586.5	503.5	149.3	95.91	58.6	NA	491.5	NA	88.8	22.55	29.26	85.3	58.19	119.15	54.8	38.4	NA	20.3	193.6	48.8	300.12	PRESENT	NA	ABSENT	PRESENT	NA	NA	NA	NA	NA	NA	3724.1	712.75	1163.25	1409.43	245.5	42.44	261.75	29.78	NA	NA	NA	NA	0.296524	0.236643	0.0384484
Nothosauroidea	Nothosaurus_giganteus	SMNS 18058	3D scan	566.72	NA	NA	77.049	73.69	271.76	476.23	202.91	90.96	27.987	NA	NA	NA	NA	NA	NA	NA	NA	NA	NA	NA	PRESENT	NA	ABSENT	PRESENT	ABSENT	2.16	2.05	1.97	6.2	NA	NA	NA	NA	NA	NA	NA	NA	NA	NA	NA	NA	NA	NA	NA	0.0493842
Nothosauroidea	Nothosaurus_giganteus	SMNS 57047	First-hand examination	NA	865.99	276.68	NA	NA	NA	NA	NA	NA	NA	NA	140.25	60.6	196.29	85.58	69.23	NA	22.87	266.62	70.03	495.85	PRESENT	NA	ABSENT	PRESENT	NA	NA	NA	NA	NA	NA	NA	NA	NA	NA	NA	NA	NA	NA	NA	NA	NA	NA	0.319496	0.226665	NA
Nothosauroidea	Nothosaurus_giganteus	SMNS 80217	3D scan	583.171	NA	NA	69.08	88.14	295.07	494.7	200.73	94.75	23.89	NA	NA	NA	NA	NA	NA	NA	NA	NA	NA	NA	PRESENT	PRESENT	ABSENT	NA	ABSENT	NA	NA	1.65	8.64	0.0532	NA	NA	NA	NA	NA	NA	NA	NA	NA	NA	NA	NA	NA	NA	0.0409657
Nothosauroidea	Nothosaurus_giganteus	SMNS 1589b	3D scan	NA	NA	NA	NA	NA	NA	NA	NA	NA	NA	NA	NA	NA	NA	NA	NA	NA	NA	NA	NA	NA	NA	NA	NA	NA	NA	NA	NA	NA	NA	NA	NA	NA	NA	NA	NA	NA	351.84	39.16	NA	NA	NA	NA	NA	NA	NA
Nothosauroidea	Nothosaurus_giganteus	SMNS 159157	3D scan	NA	NA	NA	NA	NA	NA	NA	NA	NA	NA	NA	NA	NA	NA	NA	NA	NA	NA	NA	NA	NA	NA	NA	NA	NA	NA	NA	NA	NA	NA	NA	NA	NA	NA	NA	395.57	78.34	NA	NA	NA	NA	NA	NA	NA	NA	NA
Nothosauroidea	Nothosaurus_giganteus	SMNS 17822c	3D scan	NA	NA	NA	NA	NA	NA	NA	NA	NA	NA	NA	NA	NA	NA	NA	NA	NA	NA	NA	NA	NA	NA	NA	NA	NA	NA	NA	NA	NA	NA	NA	NA	NA	NA	NA	357.14	68.32	NA	NA	NA	NA	NA	NA	NA	NA	NA
Nothosauroidea	Nothosaurus_giganteus	SMNS 81311	3D scan	NA	NA	NA	NA	NA	NA	NA	NA	NA	NA	NA	NA	NA	NA	NA	NA	NA	NA	NA	NA	NA	NA	NA	NA	NA	NA	NA	NA	NA	NA	NA	NA	NA	NA	NA	296.08	58.44	NA	NA	NA	NA	NA	NA	NA	NA	NA
Nothosauroidea	Nothosaurus_jagisteus	SMNS 56618	First-hand examination	213.59	184.04	63.91	28.96	NA	NA	NA	NA	NA	NA	12.01	40.54	11.63	37.97	23.31	16.75	NA	4.49	70.88	17.69	97.06	PRESENT	NA	ABSENT	PRESENT	ABSENT	3.83	1.91	1.9	3.24	NA	NA	624.99	NA	NA	145.175	18.974	NA	NA	NA	NA	NA	NA	0.347261	0.206314	NA
Nothosauroidea	Nothosaurus_marchicus	Dave Spiller specimen	Based on pictures	NA	76.24	23.94	NA	NA	NA	NA	NA	NA	NA	5.41	12.32	6.59	20.156	13.61	8.86	NA	3.2	26.52	8.93	39.42	PRESENT	PRESENT	ABSENT	PRESENT	ABSENT	NA	NA	NA	1.28	NA	NA	NA	NA	NA	NA	NA	NA	NA	NA	NA	NA	NA	0.314008	0.264376	NA
Nothosauroidea	Nothosaurus_marchicus	Peter specimen	Based on pictures	77.45	66.98	19.91	10.69	NA	NA	66.22	NA	10.98	NA	NA	7.79	5.03	18.83	14.22	8.63	NA	1.88	21.331	7.26	33.51	PRESENT	PRESENT	ABSENT	PRESENT	ABSENT	2.64	1.83	2.08	1.16	NA	NA	NA	NA	NA	NA	NA	NA	NA	NA	NA	NA	NA	0.297253	0.281129	NA
Nothosauroidea	Nothosaurus_marchicus	JLW 300	Based on pictures and Klein et al., 2015	NA	135.77	42.3	NA	NA	NA	NA	NA	NA	NA	13.411	22.33	15.46	NA	21.26	14.2	NA	5.32	49.25	14.36	70.52	PRESENT	PRESENT	ABSENT	PRESENT	ABSENT	3.06	NA	2.27	2.68	NA	NA	NA	NA	NA	92.52	15.16	NA	NA	NA	NA	NA	NA	0.311556	NA	NA
Nothosauroidea	Nothosaurus_marchicus	NMNHL RGM 449995	First-hand examination	NA	125.67	41.42	NA	NA	NA	NA	NA	NA	NA	6.88	21.32	10.13	34.13	21.35	13.53	8.02	NA	48.26	16.88	66.91	PRESENT	PRESENT	ABSENT	PRESENT	ABSENT	3.2	NA	2.39	2.29	NA	NA	NA	NA	NA	NA	NA	NA	NA	NA	NA	NA	NA	0.329593	0.271584	NA
Nothosauroidea	Nothosaurus_marchicus	TWE 480000375	Based on Voeten et al., 2018	NA	102.12	30.4	NA	NA	NA	NA	NA	NA	NA	NA	15.97	7.52	26	17.93	11.26	NA	3	38.48	12.94	54.92	PRESENT	PRESENT	ABSENT	PRESENT	ABSENT	NA	NA	NA	NA	NA	NA	NA	NA	NA	NA	NA	NA	NA	NA	NA	NA	NA	0.297689	0.254602	NA
Nothosauroidea	Nothosaurus_marchicus	TWE 4800000473	Based on pictures	118.99	104.66	30.21	15.34	NA	NA	101.32	NA	14.64	NA	NA	15.16	7.438	26.038	17.18	10.469	NA	3.287	36.02	11.817	57.037	PRESENT	PRESENT	ABSENT	PRESENT	ABSENT	3.03	2.13	2.26	2.17	0.329	NA	NA	NA	NA	51.605	8.92	62.828	5.371	NA	NA	NA	NA	0.288649	0.248787	NA
Nothosauroidea	Nothosaurus_marchicus	TWE 4800000474	Based on pictures and Klein et al., 2015	164.12	144.61	43	19.01	19.31	89.02	139.44	NA	22.65	NA	NA	21.53	10.302	39.94	22.76	15.07	NA	3.74	54.48	15.86	79.37	PRESENT	PRESENT	ABSENT	PRESENT	ABSENT	2.97	2.34	2.058	2.38	NA	NA	NA	NA	NA	NA	NA	NA	NA	NA	NA	NA	NA	0.297351	0.276191	NA
Nothosauroidea	Nothosaurus_mirabilis	SMNS 13155	3D scan	NA	256.19	92.89	NA	NA	NA	NA	NA	NA	NA	15.36	62.28	16.24	42.34	30.09	21.77	13.25	3.26	91.87	24.45	136.09	PRESENT	NA	ABSENT	PRESENT	ABSENT	5.11	2.04	2.48	4.83	NA	NA	NA	NA	NA	NA	NA	NA	NA	NA	NA	NA	NA	0.362582	0.165268	NA
Nothosauroidea	Nothosaurus_mirabilis	SMNS 15714	3D scan	NA	426.39	148.77	NA	NA	NA	NA	NA	NA	NA	29.5	91.22	27.84	76.15	41.18	33.16	24.14	10.28	143.91	49.59	239.69	PRESENT	NA	NA	NA	NA	NA	NA	NA	NA	NA	NA	NA	NA	NA	NA	NA	NA	NA	NA	NA	NA	NA	0.348906	0.178592	NA
Nothosauroidea	Nothosaurus_mirabilis	SMNS 16433	First-hand examination	NA	486.56	138.78	NA	NA	NA	NA	NA	NA	NA	18.39	81.03	29.11	92.42	56.91	36.89	22.21	9.03	207.05	52.7	294.91	PRESENT	NA	ABSENT	PRESENT	ABSENT	2.57	1.59	1.69	6.81	NA	NA	NA	NA	NA	NA	NA	NA	NA	NA	NA	NA	NA	0.285227	0.189946	NA
Nothosauroidea	Nothosaurus_mirabilis	SMNS 56826	3D scan	NA	442.65	149.01	NA	NA	NA	NA	NA	NA	NA	NA	97.69	26.29	NA	38.3	26.49	NA	11.05	154.03	51.37	258.58	PRESENT	NA	NA	PRESENT	NA	NA	NA	NA	NA	NA	NA	NA	NA	NA	NA	NA	NA	NA	NA	NA	NA	NA	0.336632	NA	NA
Nothosauroidea	Nothosaurus_mirabilis	SMNS 59074	3D scan	NA	325.01	121.46	NA	NA	NA	NA	NA	NA	NA	22	73.92	24.46	58.147	36.67	26.57	12.48	NA	NA	NA	167.76	PRESENT	NA	NA	NA	NA	NA	NA	NA	NA	NA	NA	NA	NA	NA	NA	NA	NA	NA	NA	NA	NA	NA	0.373712	0.178908	NA
Nothosauroidea	Nothosaurus_mirabilis	SMNS 84550	3D scan	NA	NA	NA	NA	NA	NA	NA	NA	NA	NA	NA	NA	NA	NA	NA	NA	NA	NA	NA	NA	NA	NA	NA	NA	NA	NA	NA	NA	NA	NA	NA	NA	NA	NA	NA	208.55	38.41	NA	NA	NA	NA	NA	NA	NA	NA	NA
Nothosauroidea	Nothosaurus winkelhorsti	NMNHL RGM 443825	First-hand examination	NA	48.13	15.491	NA	NA	NA	NA	NA	NA	NA	3.67	7.07	3.57	NA	9.05	5.212	4.05	1.79	15.26	NA	24.65	PRESENT	PRESENT	ABSENT	PRESENT	ABSENT	3.48	1.889	2.33	1.1	0.19	NA	NA	NA	NA	NA	NA	NA	NA	NA	NA	NA	NA	0.321857	NA	NA
Nothosauroidea	Simosaurus_gaillardoti	GPIT-PV-60638	3D scan	NA	386.05	116.677	NA	NA	NA	NA	NA	NA	NA	59.216	60.7781	31.0968	170.638	52.49	56.268	44.5	10.512	109.69	73.099	222.017	ABSENT	ABSENT	ABSENT	ABSENT	PRESENT	1.13	1.02	1.18	11.63	0.058	NA	NA	NA	NA	NA	NA	NA	NA	NA	NA	NA	NA	0.302234	0.442009	NA
Nothosauroidea	Simosaurus_gaillardoti	SMNS 10360	3D scan	NA	386.91	125.818	NA	NA	NA	NA	NA	NA	NA	54.12	59.174	43.163	161.09	55.26	56.54	56.4	12.05	116.51	71.92	222.42	ABSENT	ABSENT	ABSENT	ABSENT	PRESENT	1.83	1.23	1.23	10.52	0.1478	NA	NA	NA	NA	NA	NA	NA	NA	NA	NA	NA	NA	0.325187	0.41635	NA
Nothosauroidea	Simosaurus_gaillardoti	SMNS 16363	3D scan	NA	372.89	124.55	NA	NA	NA	NA	NA	NA	NA	54.73	66.99	30.577	147.84	48.26	51.76	33.718	11.55	101.195	63.9496	207.854	ABSENT	ABSENT	ABSENT	ABSENT	PRESENT	1.88	1.16	1.52	10.86	NA	NA	NA	NA	NA	NA	NA	NA	NA	NA	NA	NA	NA	0.334013	0.396471	NA
Nothosauroidea	Simosaurus_gaillardoti	SMNS 16638	3D scan	368.018	NA	NA	27.6907	NA	212.929	323.073	119.872	50.2192	26.709	NA	NA	NA	NA	NA	NA	NA	NA	NA	NA	NA	NA	ABSENT	ABSENT	ABSENT	PRESENT	NA	NA	1.3	7.59	NA	NA	NA	NA	NA	NA	NA	NA	NA	NA	NA	NA	NA	NA	NA	0.0725753
Nothosauroidea	Simosaurus_gaillardoti	SMNS 50714	3D scan	NA	378.495	124.433	NA	NA	NA	NA	NA	NA	NA	58.886	63.2081	38.5106	160.881	54.9042	55.5833	37.573	10.0159	112.57	71.7473	212.907	ABSENT	ABSENT	ABSENT	ABSENT	PRESENT	NA	NA	1.13	10.9	0.0615	NA	NA	NA	NA	NA	NA	NA	NA	NA	NA	NA	NA	0.328758	0.425055	NA
Nothosauroidea	Simosaurus_gaillardoti	SMNS 59366	3D scan	NA	331.516	95.28	NA	NA	NA	NA	NA	NA	NA	NA	44.86	28.105	130.9	43.467	46.439	29.6315	7.51	99.1	57.2325	197.577	ABSENT	ABSENT	ABSENT	ABSENT	PRESENT	NA	NA	1.63	8.98	NA	NA	NA	NA	NA	NA	NA	NA	NA	NA	NA	NA	NA	0.287407	0.394853	NA
Nothosauroidea	Simosaurus_gaillardoti	SMNS 7861	3D scan	400.304	NA	NA	28.715	42.049	244.152	359.56	124.629	48.303	28.5773	NA	NA	NA	NA	NA	NA	NA	NA	NA	NA	NA	ABSENT	ABSENT	ABSENT	ABSENT	PRESENT	2	1.01	1.13	9.81	0.093	NA	NA	NA	NA	NA	NA	NA	NA	NA	NA	NA	NA	NA	NA	0.071389
Nothosauroidea	Simosaurus_gaillardoti	SMNS 14733	3D scan	NA	NA	NA	NA	NA	NA	NA	NA	NA	NA	NA	NA	NA	NA	NA	NA	NA	NA	NA	NA	NA	NA	NA	NA	NA	NA	NA	NA	NA	NA	NA	NA	NA	NA	NA	259.32	29.53	199.42	18.06	NA	NA	NA	NA	NA	NA	NA
Nothosauroidea	Simosaurus_gaillardoti	SMNS 7956	3D scan	NA	NA	NA	NA	NA	NA	NA	NA	NA	NA	NA	NA	NA	NA	NA	NA	NA	NA	NA	NA	NA	NA	NA	NA	NA	NA	NA	NA	NA	NA	NA	NA	NA	NA	NA	265.61	35.53	NA	NA	NA	NA	NA	NA	NA	NA	NA
Nothosauroidea	Simosaurus_gaillardoti	SMNS 17223	3D scan	NA	NA	NA	NA	NA	NA	NA	NA	NA	NA	NA	NA	NA	NA	NA	NA	NA	NA	NA	NA	NA	NA	NA	NA	NA	NA	NA	NA	NA	NA	NA	NA	NA	NA	NA	NA	NA	216.7	18.48	NA	NA	NA	NA	NA	NA	NA
Nothosauroidea	Simosaurus_gaillardoti	SMNS 17590	3D scan	NA	NA	NA	NA	NA	NA	NA	NA	NA	NA	NA	NA	NA	NA	NA	NA	NA	NA	NA	NA	NA	NA	NA	NA	NA	NA	NA	NA	NA	NA	NA	NA	NA	NA	NA	332.7	50.02	NA	NA	NA	NA	NA	NA	NA	NA	NA
Nothosauroidea	Simosaurus_gaillardoti	SMNS 18287	3D scan	NA	NA	NA	NA	NA	NA	NA	NA	NA	NA	NA	NA	NA	NA	NA	NA	NA	NA	NA	NA	NA	NA	NA	NA	NA	NA	NA	NA	NA	NA	NA	NA	NA	NA	NA	285.89	39.96	NA	NA	NA	NA	NA	NA	NA	NA	NA
Pistosauroidea	Augustasaurus_hagdorni	FMNH PR1974	3D scan	359.99	325.83	151.7	36.92	87.69	NA	315.71	NA	NA	27.34	29.7	109.9	10.43	110.58	48.88	38.7	13.66	13.65	93.54	49.33	132.02	ABSENT	PRESENT	ABSENT	PRESENT	ABSENT	2.73	2.22	2.34	11.78	NA	NA	1106.42	NA	NA	NA	NA	NA	NA	NA	NA	NA	NA	0.46558	0.339379	0.0759466
Pistosauroidea	Wangosaurus_brevirostris	GMPKU-P-1529	Based on Ma et al., 2015	248.18	224.28	58.72	21.85	21.846	NA	NA	102.85	44.47	NA	21.74	33.91	13.46	44.305	29.72	22.73	15.52	7.62	114.02	22.35	136.32	ABSENT	PRESENT	ABSENT	PRESENT	ABSENT	3.29	2.91	2.3	4.34	NA	NA	900.5	680.59	NA	163.73	28.03	171.81	15.2	NA	NA	79.44	440.37	0.261816	0.197543	NA
Pistosauroidea	Yunguisaurus_liae	NMNS 004529/F003826	Based on Cheng et al., 2006	146.69	140.9	58.8	14.99	35.88	NA	131.82	NA	16.85	8.5718	NA	44.64	5.14	40.6	18.77	14.62	NA	7.32	42.04	23.28	60.6	ABSENT	PRESENT	ABSENT	PRESENT	ABSENT	5.06	1.99	2.04	7.34	NA	NA	NA	NA	NA	88.7	18	106.81	21.56	48.98	271.06	67.45	NA	0.417317	0.288148	0.0584348
Pistosauroidea	Yunguisaurus_liae	IVPP V14993	Based on Shang&al 2017	132.95	123.76	51.94	15.4	31.53	76.728	119.67	44.32	17.06	9.46	14.47	37.28	6.22	NA	22.24	20.09	15.29	5.32	39.01	19.87	46.33	ABSENT	PRESENT	ABSENT	PRESENT	ABSENT	5.08	2.78	3.19	7.66	0.2	NA	NA	NA	NA	NA	NA	NA	NA	NA	NA	NA	NA	0.419683	NA	0.0711546
Pistosauroidea	Yuinguisaurus_liae	ZMNH M8738	Based on Sato et al., 2014	283.02	268.27	104.62	28.35	69.7	NA	240.6	NA	26.96	21.1878	NA	75.71	8.98	75.61	42.02	37.25	NA	11.27	88.5	42.43	123.8	ABSENT	PRESENT	ABSENT	PRESENT	ABSENT	4.69	2.78	2.38	9.47	0.2839	4920	1553.79	1266	1899	212.14	37.92	181.31	36.25	114.02	601.92	119.58	691.47	0.38998	0.281843	0.0748631
[truncated: 29 more columns]

## Sheet: Species_traits
Clade	Species	Longirostry	Gullet (Snout_width)	Functionnal jaw robusticity	Relative symphysial length	Functional toothrow	Anterior mechanical advantage	Posterior mechanical advantage	Opening mechanical advantage	Supratemporal Fenestra Area	Nares position	Relative nares size	Orbit size	Occular offset	Parietal foramen size	Postorbital region length	Tooth crown shape	Absolute crown height	Crown curvature	Heterodonty index	Jaw or snout anterior constriction	Pointed and recurved tooth crowns	Enlarge procumbent dentary fangs	Bulbous crushing dentition	Crown deep striations	Relative skull length	Relative neck length	Trunk proportion	Tail proportion	Propodial variation	Propodial size	Humerus gracility	Femur gracility	Forelimb Aspect Ratio	Hindlimb Aspect Ratio
Pachypleurosauroidea	Qianxisaurus_chajiangensis	0.485655	0.292404	0.0353929	NA	0.557893	0.170637	0.436183	0.0991754	0.000276677	0.269869	0.10509	0.69017	0.0958558	0.0289106	0.23887	1.02	1.4	NA	NA	0	0	0	0	1	0.353595	0.413845	NA	NA	0.913678	0.609981	0.184615	0.181114	NA	NA
Pachypleurosauroidea	Anarosaurus_heterodontus	0.426872	0.368036	0.0500994	0.0620932	0.565653	0.182708	0.39626	0.129683	0.00285284	0.173676	0.114029	0.669971	0.159123	0.0288315	0.313197	2.05	0.987	NA	NA	0	0	0	0	1	NA	NA	NA	NA	NA	NA	0.15276	0.0994127	NA	0.199464
Pachypleurosauroidea	Dawazisaurus_brevis	0.325028	0.341935	NA	NA	0.509329	0.21353	0.440646	0.136447	0.00868014	0.161513	0.0787542	0.634748	0.0745273	0.0349277	0.438265	1.97	0.8	NA	1.51308	0	1	1	0	0	0.469175	0.98035	0.253374	0.406395	0.729915	0.811346	0.210481	0.114889	0.176307	0.173268
Pachypleurosauroidea	Diandongosaurus_acutidentatus	0.370419	NA	NA	0.1375	0.520365	0.150563	0.336851	0.135474	0.00848584	0.175364	0.152337	0.684307	0.114639	0.0609517	0.331439	2.27	0.97	NA	2.5122	0	1	1	0	1	0.32969	0.891261	0.278669	0.398573	0.726582	0.938382	0.163771	0.0962382	0.171856	0.17777
Pachypleurosauroidea	Dianmeisaurus_gracilis	0.274038	0.440684	NA	0.0698207	0.44029	0.142934	0.315091	0.189751	0.00705117	0.104201	0.079398	0.852526	NA	0.0630342	0.422772	2.59	0.655	NA	1.06062	0	1	0	0	1	0.30941	0.892561	0.267371	0.427487	0.822882	0.902751	0.169035	0.0780512	0.142851	0.149185
Pachypleurosauroidea	Dianopachysaurus_dingi	0.31738	0.381192	NA	NA	NA	NA	NA	NA	0.00661147	0.157431	0.0596138	0.719454	NA	0.0503778	0.424433	1.91	0.67	NA	1.32227	0	1	0	0	1	0.547499	0.770492	NA	NA	0.688609	0.56759	0.228786	0.147189	NA	NA
Pachypleurosauroidea	Honghesaurus_longicaudalis	0.458857	0.318423	0.0367175	NA	0.562564	0.102246	0.284821	0.130988	0.0045762	0.205935	0.108885	0.694036	0.0808507	0.0377889	0.255148	1.49	1.49	NA	1.13401	0	0	0	0	NA	0.327662	0.462382	0.253877	0.545903	0.946407	0.481003	0.148649	0.126675	0.141774	0.132367
Pachypleurosauroidea	Luopingosaurus_imparilis	0.560843	NA	0.0434219	0.0782026	0.516742	0.133384	0.321734	0.123513	NA	0.341383	0.0961174	0.645573	NA	NA	0.240767	2.22	1.06	NA	0.983784	0	0	0	0	NA	0.288591	0.514277	NA	NA	0.995986	0.471828	0.178841	0.144506	0.125954	0.136701
Pachypleurosauroidea	Keichousaurus	0.316263	0.39581	0.039628	0.0624971	0.499743	0.143904	0.330565	0.186672	0.00675062	0.127725	0.102775	0.825409	NA	0.0319827	0.380116	2.916	0.7225	0.195	1.34321	0	1	0	0	0	0.395861	1.07425	0.264128	0.398186	1.00081	0.698472	0.208871	0.123385	0.173819	0.188323
Pachypleurosauroidea	Neusticosaurus_edwardsii	0.441479	0.392849	0.0373	0.0382907	0.473292	0.128306	0.272511	0.119897	0.00129828	0.178938	0.114134	0.660116	0.0793006	0.0730624	0.304456	2.233	0.974	0.2403	1.39574	0	1	0	0	0	0.266067	0.416624	0.32071	0.560167	1.45856	0.634366	0.111124	0.150825	0.117909	0.170671
Pachypleurosauroidea	Neusticosaurus_peyeri	0.422966	0.384342	0.0338427	0.049044	0.441248	0.128382	0.234612	0.120694	0.00230824	0.162711	0.124174	0.617175	0.0683578	0.0538028	0.324167	2.22409	0.6595	0.39068	1.3095	0	1	0	0	0	0.323516	0.500916	0.291656	0.476908	1.11406	0.62344	0.149153	0.1164	0.127414	0.142435
Pachypleurosauroidea	Neusticosaurus_pusillus	0.395869	0.426495	0.0372876	0.046194	0.448022	0.126852	0.266565	0.129308	0.00218051	0.156175	0.114054	0.703905	0.0809632	0.0497894	0.333472	2.29152	0.656667	0.283525	1.26218	0	1	0	0	0	0.33826	0.533864	0.272685	0.493042	1.0189	0.671797	0.195826	0.103115	0.163509	0.14456
Pachypleurosauroidea	Odoiporosaurus_teruzzii	0.519064	0.475953	0.039335	NA	NA	0.16874	NA	0.102598	0.00211869	0.249783	0.118934	0.678206	0.0853553	0.034662	0.281196	2.22	1.21	NA	0.976285	0	1	0	0	1	NA	NA	NA	NA	1.28104	0.788562	0.128244	0.0964286	NA	NA
Pachypleurosauroidea	Panzhousaurus_rotundirostris	0.245498	0.436967	NA	NA	NA	NA	NA	0.14776	0.00390254	0.0834123	0.137393	0.796565	NA	0.028436	0.51564	2.22	0.83	NA	NA	0	1	0	0	0	0.174258	0.652127	NA	NA	1.05824	1.32654	0.179608	0.0982494	0.129397	0.143619
Pachypleurosauroidea	Prosantosaurus_scheffoldi	0.416042	0.400123	0.043378	0.0722831	0.50994	0.170111	0.36133	0.0866269	0.00230771	0.222921	0.0873425	0.590542	NA	0.0440463	0.375872	1.95	1.06333	0.3389	1.62367	0	1	0	0	0	0.375535	0.626719	NA	NA	1.04752	0.622678	0.149221	0.0948693	0.175745	0.157478
Pachypleurosauroidea	Serpianosaurus_mirigiolensis	0.48778	0.416097	0.0401286	0.0487543	0.533471	0.117422	0.33586	0.118447	0.00193295	0.24689	0.107541	0.663463	0.0954305	0.0321466	0.256862	1.874	0.959	0.34118	1.26529	0	1	0	0	0	0.400815	0.516446	0.28035	0.465245	1.03009	0.579608	0.183963	0.0966103	0.175799	0.147942
Pachypleurosauroidea	Wumengosaurus_delicatomandibularis	0.620322	NA	0.0376277	NA	0.646233	0.0858913	0.282095	0.087108	0.00428868	0.376981	0.132233	0.601184	0.0989848	0.0306789	0.160483	1.375	0.735	NA	1.14179	0	0	0	0	1	0.25721	0.479456	0.316538	0.446526	0.948499	0.706491	0.1623	0.116798	0.147555	0.130956
Nothosauroidea	Brevicaudosaurus_jiyangshanensis	0.311722	0.342134	NA	NA	0.55877	NA	NA	0.115961	0.013238	0.132707	0.0973182	0.521355	NA	0.0212884	0.500829	2.27	2.43	NA	1.7382	0	1	1	0	1	0.509208	1.05998	0.28457	0.324979	1.0336	0.691181	0.336687	0.112	0.233227	0.18797
Nothosauroidea	Lariosaurus_calcagnii	0.335271	0.304808	0.0618699	0.128935	0.571355	0.141139	0.391481	0.14247	0.018826	0.196579	0.108877	0.456434	NA	0.0296394	0.502016	2.314	2.848	NA	2.19321	0	1	1	0	1	0.397893	0.688868	0.298383	0.386396	1.24039	0.510905	0.218151	0.125282	0.188343	0.148276
Nothosauroidea	Lariosaurus_balsami	0.307371	0.338645	0.0363008	NA	0.541054	0.154004	0.421348	0.151951	0.0103123	0.157271	0.047012	0.436506	NA	0.0249004	0.523904	2.25	2.63	NA	1.91743	NA	NA	1	0	NA	0.415933	0.662365	NA	NA	0.826902	0.733068	0.250411	0.129076	0.208589	0.137664
Nothosauroidea	Lariosaurus_buzzii	0.326953	0.359086	NA	0.143637	NA	NA	NA	0.124453	0.0172264	0.178464	0.0638068	0.541337	NA	0.0291492	0.432096	1.53	2.28	0.3031	1.49289	1	1	1	0	1	NA	NA	NA	NA	0.727618	0.390312	0.278296	0.118962	NA	NA
Nothosauroidea	Lariosaurus_hongguoensis	0.35234	0.308661	0.0473023	0.107169	NA	0.127047	NA	0.14278	0.0169191	0.182786	0.0750941	0.546357	0.0966111	0.0484131	0.395912	2.1	1.84	NA	NA	1	1	1	0	1	NA	NA	NA	NA	0.707565	0.466487	0.233377	0.163745	NA	0.177419
Nothosauroidea	Lariosaurus_xingyiensis	0.346221	0.260715	0.0462426	0.123843	0.538886	0.167073	0.409116	0.159809	0.0174058	0.178279	0.0726078	0.447011	0.0628578	0.0254587	0.49251	2.11	2.07	NA	2.0597	1	NA	1	0	1	NA	NA	NA	NA	0.755209	0.770667	0.240906	0.134726	NA	0.177419
Nothosauroidea	Lariosaurus_vosseveldensis	0.3013	0.311219	NA	NA	NA	NA	NA	0.188363	0.0167752	0.152083	0.0681067	0.552566	NA	0.0251267	0.506723	2.43	0.69	NA	NA	1	1	1	0	1	NA	NA	NA	NA	NA	NA	NA	NA	NA	NA
Nothosauroidea	Lariosaurus_youngi	0.35007	0.261065	NA	0.15612	NA	0.14496	NA	0.15901	0.0161627	0.182718	0.0645493	0.451045	NA	0.0352776	0.412185	1.84	5.14	0.456	1.64205	1	1	1	0	1	0.400729	0.573727	NA	NA	0.779078	0.651715	0.201726	0.107763	0.248994	0.18873
Nothosauroidea	Nothosaurus_cristatus	0.348235	0.191933	NA	NA	NA	NA	NA	NA	0.014932	0.23245	0.0633743	0.251388	NA	0.0238914	0.575385	2.42	5.13	0.2575	1.1913	1	1	1	0	1	NA	NA	NA	NA	NA	NA	NA	NA	NA	NA
Nothosauroidea	Nothosaurus_luopingensis	0.289403	0.319594	NA	NA	NA	0.215521	NA	0.154936	0.0163649	0.155863	0.0700646	0.490927	NA	0.0201721	0.547068	2.5	2.54	NA	NA	NA	1	1	0	1	NA	NA	NA	NA	0.890631	0.690425	0.153527	0.0937865	0.183623	0.172377
Nothosauroidea	Nothosaurus_giganteus	0.30801	0.231654	0.0429328	0.127028	0.492753	0.187734	0.460152	0.165522	0.0155411	0.165684	0.0927744	0.285783	NA	0.0333634	0.584325	1.81	7.42	0.0532	1.05366	1	1	1	0	1	0.504191	0.612723	0.312357	0.378462	0.937918	0.519861	0.189898	0.112537	NA	NA
Nothosauroidea	Nothosaurus_jagisteus	0.347261	0.206314	NA	NA	NA	NA	NA	NA	0.0185096	0.220278	0.0631928	0.341915	NA	0.0243969	0.527385	1.9	3.24	NA	2.00524	1	1	1	0	1	NA	NA	NA	NA	NA	NA	0.130697	NA	NA	NA
Nothosauroidea	Nothosaurus_marchicus	0.305157	0.266111	NA	0.117658	0.542408	0.15758	NA	0.149721	0.0209382	0.151734	0.0817084	0.445707	NA	0.0326452	0.528687	2.167	1.99333	0.329	1.37813	1	1	1	0	#REF!	NA	NA	NA	NA	5.78531	0.141975	0.168354	NA	NA	NA
Nothosauroidea	Nothosaurus_mirabilis	0.341412	0.178179	NA	NA	NA	NA	NA	NA	0.0199937	0.214341	0.0646325	0.286043	0.048095	0.0200891	0.559958	2.085	5.82	NA	2.06063	1	1	1	0	1	NA	NA	NA	NA	NA	NA	0.184176	NA	NA	NA
Nothosauroidea	Nothosaurus_winkelhorsti	0.321857	NA	NA	NA	NA	NA	NA	NA	NA	0.146894	0.0741741	0.465462	0.0841471	0.0371909	0.512155	NA	1.1	0.2125	1.84224	1	1	1	0	1	NA	NA	NA	NA	NA	NA	NA	NA	NA	NA
Nothosauroidea	Simosaurus_gaillardoti	0.31552	0.414947	0.0719821	0.105043	0.59425	0.144891	0.403257	0.0827859	0.0264302	0.158469	0.0921267	0.440456	0.108023	0.0276928	0.573173	1.30286	10.0414	0.090075	1.54913	0	0	0	1	#REF!	NA	NA	NA	NA	NA	NA	NA	0.0879209	NA	NA
Pistosauroidea	Augustasaurus_hagdorni	0.46558	0.339379	0.0759466	0.24359	NA	NA	NA	0.116943	0.0217318	0.337292	0.0320106	0.422215	0.0419237	0.041893	0.405181	2.34	11.78	NA	1.22973	0	1	1	0	1	NA	NA	NA	NA	NA	NA	NA	NA	NA	NA
Pistosauroidea	Wangosaurus_brevirostris	0.261816	0.197543	NA	0.0880248	NA	NA	0.432377	NA	0.0253307	0.151195	0.0600143	0.367346	0.0691992	0.0339754	0.607812	2.3	4.34	NA	1.13058	0	1	1	0	NA	0.364654	1.32312	NA	NA	0.952971	0.766051	0.171196	0.0884698	NA	0.180394
Pistosauroidea	Yunguisaurus_liae	0.408994	0.284995	0.0681508	0.242676	0.577119	0.127479	0.142559	0.120078	0.0253468	0.300088	0.0400707	0.457885	NA	0.0456494	0.421974	2.53667	8.15667	0.24195	2.01903	0	1	1	0	1	0.223555	1.22732	0.257317	0.385976	1.00024	0.716952	0.190841	0.200894	0.185063	0.172936

## Sheet: Eosauropt_localisation
Clade	Species	Localisation
Pachypleurosauroidea	Qianxisaurus_chajiangensis	Eastern_Tethys
Pachypleurosauroidea	Anarosaurus_heterodontus	Western_Tethys
Pachypleurosauroidea	Dawazisaurus_brevis	Eastern_Tethys
Pachypleurosauroidea	Diandongosaurus_acutidentatus	Eastern_Tethys
Pachypleurosauroidea	Dianmeisaurus_gracilis	Eastern_Tethys
Pachypleurosauroidea	Dianopachysaurus_dingi	Eastern_Tethys
Pachypleurosauroidea	Honghesaurus longicaudalis	Eastern_Tethys
Pachypleurosauroidea	Luopingosaurus_imparilis	Eastern_Tethys
Pachypleurosauroidea	Keichousaurus_hui	Eastern_Tethys
Pachypleurosauroidea	Neusticosaurus_edwardsii	Western_Tethys
Pachypleurosauroidea	Neusticosaurus_peyeri	Western_Tethys
Pachypleurosauroidea	Neusticosaurus_pusillus	Western_Tethys
Pachypleurosauroidea	Odoiposaurus_teruzzii	Western_Tethys
Pachypleurosauroidea	Panzhousaurus_rotundirostris	Eastern_Tethys
Pachypleurosauroidea	Prosantosaurus_scheffoldi	Western_Tethys
Pachypleurosauroidea	Serpianosaurus_mirigiolensis	Western_Tethys
Pachypleurosauroidea	Wumengosaurus_delicatomandibularis	Eastern_Tethys
Nothosauroidea	Brevicaudosaurus_jiyangshanensis	Eastern_Tethys
Nothosauroidea	Ceresiosaurus_calcagnii	Western_Tethys
Nothosauroidea	Lariosaurus_balsami	Western_Tethys
Nothosauroidea	Lariosaurus_buzzii	Western_Tethys
Nothosauroidea	Lariosaurus_hongguoensis	Eastern_Tethys
Nothosauroidea	Lariosaurus_xingyiensis	Eastern_Tethys
Nothosauroidea	Lariosaurus_vosseveldensis	Western_Tethys
Nothosauroidea	Lariosaurus_youngi	Eastern_Tethys
Nothosauroidea	Nothosaurus_cristatus	Western_Tethys
Nothosauroidea	Nothosaurus_luopingensis	Eastern_Tethys
Nothosauroidea	Nothosaurus_giganteus	Western_Tethys
Nothosauroidea	Nothosaurus_jagisteus	Western_Tethys
Nothosauroidea	Nothosaurus_marchicus	Western_Tethys
Nothosauroidea	Nothosaurus_mirabilis	Western_Tethys
Nothosauroidea	Nothosaurus_winkelhorsti	Western_Tethys
Nothosauroidea	Simosaurus_gaillardoti	Western_Tethys
Pistosauroidea	Augustasaurus_hagdorni	Eastern_Panthalassa
Pistosauroidea	Wangosaurus_brevirostris	Eastern_Tethys
Pistosauroidea	Yunguisaurus_liae	Eastern_Tethys

## Sheet: Eosauropt_timescaling
Clade	Species	Stage	FAD	LAD
Pachypleurosauroidea	Qianxisaurus_chajiangensis	Longboardian	239.1	237
Pachypleurosauroidea	Anarosaurus_heterodontus	Anisian (Bithynian - Pelsonian)	246.36	243.99
Pachypleurosauroidea	Dawazisaurus_brevis	Anisian (Pelsonian)	244.94	243.99
Pachypleurosauroidea	Diandongosaurus_acutidentatus	Middle Anisian (Pelsonian)	244.94	243.99
Pachypleurosauroidea	Dianmeisaurus_gracilis	Anisian (Pelsonian)	244.94	243.99
Pachypleurosauroidea	Dianopachysaurus_dingi	Anisian (Pelsonian)	244.94	243.99
Pachypleurosauroidea	Honghesaurus longicaudalis	Anisian (Pelsonian)	244.94	243.99
Pachypleurosauroidea	Luopingosaurus_imparilis	Anisian (Pelsonian)	244.94	243.99
Pachypleurosauroidea	Keichousaurus	Ladinian (Longboardian)	239.1	237
Pachypleurosauroidea	Neusticosaurus_edwardsii	Longboardian	239.1	237
Pachypleurosauroidea	Neusticosaurus_peyeri	Ladinian (Fassanian)	241.5	239.1
Pachypleurosauroidea	Neusticosaurus_pusillus	Ladinian (Fassanian)	241.5	239.1
Pachypleurosauroidea	Odoiposaurus_teruzzii	Anisian (Illyrian)	243.99	241.5
Pachypleurosauroidea	Panzhousaurus_rotundirostris	Anisian (Pelsonian)	244.94	243.99
Pachypleurosauroidea	Prosantosaurus_scheffoldi	Ladinian (Fassanian)	241.5	239.1
Pachypleurosauroidea	Serpianosaurus_mirigiolensis	Anisian (Illyrian)	243.99	241.5
Pachypleurosauroidea	Wumengosaurus_delicatomandibularis	Anisian (Pelsonian)	244.94	243.99
Nothosauroidea	Brevicaudosaurus_jiyangshanensis	Ladinian (Longboardian)	239.1	237
Nothosauroidea	Ceresiosaurus_calcagnii	Ladinian (Fassanian)	241.5	239.1
Nothosauroidea	Lariosaurus_balsami	Ladinian (Longboardian)	239.1	237
Nothosauroidea	Lariosaurus_buzzii	Ladinian (Illyrian)	243.99	241.5
Nothosauroidea	Lariosaurus_hongguoensis	Anisian (Pelsonian)	244.94	243.99
Nothosauroidea	Lariosaurus_xingyiensis	Ladinian (Longboardian)	239.1	237
Nothosauroidea	Lariosaurus_vosseveldensis	Anisian (Bithynian)	246.36	244.94
Nothosauroidea	Lariosaurus_youngi	Ladinian (Longboardian)	239.1	237
Nothosauroidea	Nothosaurus_cristatus	Longboardian	239.1	237
Nothosauroidea	Nothosaurus_luopingensis	Anisian (Pelsonian)	244.94	243.99
Nothosauroidea	Nothosaurus_giganteus	Illyrian - Tuvalian	243.99	233.5
Nothosauroidea	Nothosaurus_jagisteus	Ladinian (Fassanian)	241.5	239.1
Nothosauroidea	Nothosaurus_marchicus	Bithynian - Illyrian	246.36	241.5
Nothosauroidea	Nothosaurus_mirabilis	Illyrian - Fassanian	243.99	239.1
Nothosauroidea	Nothosaurus_winkelhorsti	Anisian (Bithynian)	246.36	244.94
Nothosauroidea	Simosaurus_gaillardoti	Fassanian - Tuvalian	241.5	233.5
Pistosauroidea	Augustasaurus_hagdorni	Anisian (Illyrian)	243.99	241.5
Pistosauroidea	Wangosaurus_brevirostris	Ladinian (Longboardian)	239.1	237
Pistosauroidea	Yunguisaurus_liae	Ladinian (Longboardian)	239.1	237

## Sheet: Skull_size_to_plot
Clade	Species	Mandible size	Skull size
Pachypleurosauroidea	Qianxisaurus chajiangensis	98.89	98.89
Pachypleurosauroidea	Anarosaurus_heterodontus	40.364	38.1233
Pachypleurosauroidea	Dawazisaurus_brevis	50.38	44.95
Pachypleurosauroidea	Diandongosaurus_acutidentatus	26.4	23.5
Pachypleurosauroidea	Dianmeisaurus_gracilis	26.21	22.67
Pachypleurosauroidea	Dianopachysaurus_dingi	26.05	23.82
Pachypleurosauroidea	Honghesaurus_longicaudalis	38.129	34.137
Pachypleurosauroidea	Keichousaurus	23.38	19.866
Pachypleurosauroidea	Luopingosaurus_imparilis	46.29	42.24
Pachypleurosauroidea	Neusticosaurus_edwardsii	44.86	39.1511
Pachypleurosauroidea	Neusticosaurus_peyeri	28.3524	25.4022
Pachypleurosauroidea	Neusticosaurus_pusillus	27.9824	25.3367
Pachypleurosauroidea	Odoiporosaurus_teruzzii	49.32	46.16
Pachypleurosauroidea	Panzhousaurus_rotundirostris	24.41	21.1
Pachypleurosauroidea	Prosantosaurus_scheffoldi	48.7534	44.106
Pachypleurosauroidea	Serpianosaurus_mirigiolensis	50.1791	45.9582
Pachypleurosauroidea	Wumengosaurus_delicatomandibularis	83.3667	77.72
Nothosauroidea	Brevicaudosaurus_jiyangshanensis	77.42	72.34
Nothosauroidea	Ceresiosaurus_calcagnii	158.675	142.524
Nothosauroidea	Lariosaurus_balsami	115.7	100.4
Nothosauroidea	Lariosaurus_buzzii	103.852	87.138
Nothosauroidea	Lariosaurus_hongguoensis	108.24	92.95
Nothosauroidea	Lariosaurus xingyiensis	103.9	91.45
Nothosauroidea	Lariosaurus_vosseveldensis	53.31	45.4
Nothosauroidea	Lariosaurus_youngi	214.45	184.8
Nothosauroidea	Nothosaurus_cristatus	NA	386.8
Nothosauroidea	Nothosaurus_luopingensis	167.83	148.7
Nothosauroidea	Nothosaurus_giganteus	578.797	503.5
Nothosauroidea	Nothosaurus_jagisteus	213.59	184.04
Nothosauroidea	Nothosaurus_marchicus	120.187	108.007
Nothosauroidea	Nothosaurus_mirabilis	NA	387.36
Nothosauroidea	Nothosaurus_winkelhorsti	NA	48.13
Nothosauroidea	Simosaurus_gaillardoti	384.15	371.172
Pistosauroidea	Augustasaurus_hagdorni	359.99	325.83
Pistosauroidea	Wangosaurus brevirostris	248.18	224.28
Pistosauroidea	Yunguisaurus_liae	283.02	268.27

## Sheet: Eosauropt_humerus_length
Clade	Species	Humerus length
Pachypleurosauroidea	Qianxisaurus chajiangensis	50.7
Pachypleurosauroidea	Dawazisaurus_brevis	26.62
Pachypleurosauroidea	Diandongosaurus_acutidentatus	17.66
Pachypleurosauroidea	Dianmeisaurus_gracilis	17.4
Pachypleurosauroidea	Dianopachysaurus_dingi	9.31
Pachypleurosauroidea	Honghesaurus_longicaudalis	15.54
Pachypleurosauroidea	Keichousaurus	13.085
Pachypleurosauroidea	Luopingosaurus_imparilis	19.85
Pachypleurosauroidea	Neusticosaurus_edwardsii	39.7655
Pachypleurosauroidea	Neusticosaurus_peyeri	18.5879
Pachypleurosauroidea	Neusticosaurus_pusillus	17.3315
Pachypleurosauroidea	Odoiporosaurus_teruzzii	46.63
Pachypleurosauroidea	Panzhousaurus_rotundirostris	29.62
Pachypleurosauroidea	Prosantosaurus_scheffoldi	28.9228
Pachypleurosauroidea	Serpianosaurus_mirigiolensis	28.211
Pachypleurosauroidea	Wumengosaurus_delicatomandibularis	56.54
Nothosauroidea	Brevicaudosaurus_jiyangshanensis	51.7
Nothosauroidea	Ceresiosaurus_calcagnii	99.0583
Nothosauroidea	Lariosaurus_balsami	60.9
Nothosauroidea	Lariosaurus_buzzii	24.7
Nothosauroidea	Lariosaurus_hongguoensis	30.7
Nothosauroidea	Lariosaurus xingyiensis	61.3
Nothosauroidea	Lariosaurus_youngi	93.84
Nothosauroidea	Nothosaurus_luopingensis	91.45
Nothosauroidea	Nothosaurus_giganteus	323.572
Pistosauroidea	Wangosaurus brevirostris	163.73
Pistosauroidea	Yunguisaurus_liae	212.1

## Sheet: posterior_skull_width_to_plot
Clade	Species	Posterior_skull_width
Pachypleurosauroidea	Qianxisaurus_chajiangensis	34.09
Pachypleurosauroidea	Anarosaurus_heterodontus	7.69
Pachypleurosauroidea	Dawazisaurus_brevis	18.91
Pachypleurosauroidea	Diandongosaurus_acutidentatus	45.12
Pachypleurosauroidea	Dianmeisaurus_gracilis	11.55
Pachypleurosauroidea	Dianopachysaurus_dingi	15.62
Pachypleurosauroidea	Honghesaurus longicaudalis	15.19
Pachypleurosauroidea	Luopingosaurus _imparilis	13.12
Pachypleurosauroidea	Keichousaurus	7.84
Pachypleurosauroidea	Neusticosaurus_edwardsii	13.24
Pachypleurosauroidea	Neusticosaurus_peyeri	8.97
Pachypleurosauroidea	Neusticosaurus_pusillus	7.65
Pachypleurosauroidea	Odoiporosaurus_teruzzii	19.86
Pachypleurosauroidea	Panzhousaurus_rotundirostris	10.68
Pachypleurosauroidea	Prosantosaurus_scheffoldi	17.63
Pachypleurosauroidea	Serpianosaurus_mirigiolensis	15.88
Pachypleurosauroidea	Wumengosaurus_delicatomandibularis	NA
Nothosauroidea	Brevicaudosaurus_jiyangshanensis	29.66
Nothosauroidea	Ceresiosaurus_calcagnii	60.1
Nothosauroidea	Lariosaurus_balsami	48.3
Nothosauroidea	Lariosaurus_buzzii	45.5
Nothosauroidea	Lariosaurus_hongguoensis	31.25
Nothosauroidea	Lariosaurus_xingyiensis	32.65
Nothosauroidea	Lariosaurus_vosseveldensis	20.28
Nothosauroidea	Lariosaurus_youngi	77.08
Nothosauroidea	Nothosaurus_cristatus	106.92
Nothosauroidea	Nothosaurus_luopingensis	55.53
Nothosauroidea	Nothosaurus_giganteus	265.17
Nothosauroidea	Nothosaurus_jagisteus	62.2
Nothosauroidea	Nothosaurus_marchicus	45.65
Nothosauroidea	Nothosaurus_mirabilis	154.7
Nothosauroidea	Nothosaurus_winkelhorsti	NA
Nothosauroidea	Simosaurus_gaillardoti	167.96
Pistosauroidea	Augustasaurus_hagdorni	123.63
Pistosauroidea	Wangosaurus_brevirostris	78.43
Pistosauroidea	Yunguisaurus_liae	110.218
